# Supplementary material for: Data assimilation in operator algebras
Source: PubMed Central journal article supplement — Proc Natl Acad Sci U S A. 2023 Feb 17;120(8):e2211115120. doi: 10.1073/pnas.2211115120 (PMC9974492; doi:10.1073/pnas.2211115120), 2023-02-17
Supplement: pnas.2211115120.sapp.pdf [file pnas.2211115120.sapp.pdf]

1

## 2 **Supplementary Information for**

### 3 **Data Assimilation in Operator Algebras**

4 **David Freeman, Dimitrios Giannakis, Brian Mintz, Abbas Ourmazd, and Joanna Slawinska**

5 **Dimitrios Giannakis.**

6 **E-mail: [dimitrios.giannakis@dartmouth.edu](mailto:dimitrios.giannakis@dartmouth.edu)**

#### 7 **This PDF file includes:**

8     Supplementary text

9     Figs. S1 to S2

10    Tables S1 to S3

11    SI References

## 12 **Supporting Information Text**

13 This SI Appendix addresses the following topics:

- 14 1. Technical assumptions on the dynamical system, observation map, and forecast observable (section 1).
- 15 2. Finite-dimensional approximation methods underlying QMDA and associated pseudocode (section 2).
- 16 3. Quantum circuit implementation in Qiskit (sec 3).
- 17 4. Forecast skill metrics (section 4).
- 18 5. Properties of the Lorenz 96 (L96) multiscale and Community Climate System Model version 4 (CCSM4) datasets
- 19 (section 5).

20 Equation numbers in the SI Appendix are prefixed by ‘S’. Equation and figure numbers without S prefixes refer to equations  
21 and figures in the main text, respectively. Tables [S1](#) and [S2](#) provide a summary of the definitions of the main symbols used in  
22 the main text and SI Appendix. Table [S3](#) summarizes the data attributes and QMDA parameters for the L96 multiscale and  
23 El Niño Southern Oscillation (ENSO) experiments. Figures [S1](#) and [S2](#) show forecast skill scores for the L96 multiscale and  
24 ENSO experiments, respectively, for various values of the QMDA Hilbert space dimension  $L$ .

Table S1. Symbols used in the main text and SI Appendix (continues to Table S2).

| Symbol                                                                                | Meaning                                                                                                                                                                                                                                                                                         |
|---------------------------------------------------------------------------------------|-------------------------------------------------------------------------------------------------------------------------------------------------------------------------------------------------------------------------------------------------------------------------------------------------|
| $\mathbf{A}_L$                                                                        | $L \times L$ real matrix representing $\pi_L f$ in the $\{\phi_l\}$ basis of $H_L$                                                                                                                                                                                                              |
| $\mathbf{A}_{L,N}$                                                                    | $L \times L$ real matrix representing $\pi_{L,N} \hat{f}_N$ in the $\{\phi_{l,N}\}$ basis of $H_{L,N}$                                                                                                                                                                                          |
| $\mathfrak{A} = L^\infty(X, \mu)$                                                     | Abelian algebra of observables                                                                                                                                                                                                                                                                  |
| $\mathfrak{A}_* = L^1(X, \mu)$                                                        | Predual of $\mathfrak{A}$                                                                                                                                                                                                                                                                       |
| $\hat{\mathfrak{A}}_N = L^\infty(X, \mu_N)$                                           | Abelian algebra of observables with respect to sampling measure                                                                                                                                                                                                                                 |
| $ \mathbf{b}\rangle$                                                                  | Quantum computational basis vectors of $\mathbb{B}_n$                                                                                                                                                                                                                                           |
| $\mathcal{B}(\mathbb{R})$                                                             | Borel $\sigma$ -algebra on $\mathbb{R}$                                                                                                                                                                                                                                                         |
| $\mathfrak{B} = B(H)$                                                                 | Algebra of bounded operators on $H$ , equipped with operator norm, $\ A\ _{\mathfrak{B}}$                                                                                                                                                                                                       |
| $\mathfrak{B}_* = B_1(H)$                                                             | Predual of $\mathfrak{B}$ (space of trace-class operators on $H$ ), equipped with trace norm, $\ A\ _{\mathfrak{B}_*}$                                                                                                                                                                          |
| $\mathfrak{B}_L = B(H_L)$                                                             | Algebra of linear maps on $H_L$ , identified with a subalgebra of $\mathfrak{B}$                                                                                                                                                                                                                |
| $\hat{\mathfrak{B}}_N = B(\hat{H}_N)$                                                 | Algebra of linear maps on $\hat{H}_N$                                                                                                                                                                                                                                                           |
| $\hat{\mathfrak{B}}_{L,N} = B(H_{L,N})$                                               | Algebra of linear maps on $H_{L,N}$ , identified with a subalgebra of $\hat{\mathfrak{B}}_N$                                                                                                                                                                                                    |
| $\mathbb{B}_n$                                                                        | $2^n$ -dimensional Hilbert space associated with $n$ qubits                                                                                                                                                                                                                                     |
| $C(X)$                                                                                | Space of continuous functions on $X$ , equipped with uniform norm $\ f\ _{C(X)}$                                                                                                                                                                                                                |
| $\mathfrak{C}$                                                                        | Algebra of bounded operators on $C(X)$ , equipped with operator norm $\ A\ _{\mathfrak{C}}$                                                                                                                                                                                                     |
| $E_f : \mathcal{B}(\mathbb{R}) \rightarrow \mathfrak{A}$                              | Projection-valued measure (PVM) of $f$                                                                                                                                                                                                                                                          |
| $E_{\pi f} : \mathcal{B}(\mathbb{R}) \rightarrow \mathfrak{B}$                        | PVM of $\pi f$ ; shorthand notation: $E \equiv E_{\pi f}$                                                                                                                                                                                                                                       |
| $E_{\pi_L f} : \mathcal{B}(\mathbb{R}) \rightarrow \mathfrak{B}_L$                    | PVM of $\pi_L f$ ; shorthand notation: $E_L \equiv E_{\pi_L f}$                                                                                                                                                                                                                                 |
| $E_{\pi_{L,N} f} : \mathcal{B}(\mathbb{R}) \rightarrow \mathfrak{B}_{L,N}$            | PVM of $\pi_{L,N} f$ ; shorthand notation: $E_{L,N} \equiv E_{\pi_{L,N} \hat{f}_N}$                                                                                                                                                                                                             |
| $\mathbf{E}_L : \mathcal{B}(\mathbb{R}) \rightarrow \mathbb{M}_L$                     | Matrix representation of $E_L$ in the $\{\phi_l\}$ basis of $H_L$                                                                                                                                                                                                                               |
| $\mathbf{E}_{L,N} : \mathcal{B}(\mathbb{R}) \rightarrow \mathbb{M}_{L,N}$             | Matrix representation of $E_{L,N}$ in the $\{\phi_{l,N}\}$ basis of $H_{L,N}$                                                                                                                                                                                                                   |
| $\mathcal{E}(\mathfrak{A}) \subset \mathfrak{A}$                                      | Effect space of $\mathfrak{A}$                                                                                                                                                                                                                                                                  |
| $\mathcal{E}(\hat{\mathfrak{A}}_N) \subset \hat{\mathfrak{A}}_N$                      | Effect space of $\hat{\mathfrak{A}}_N$                                                                                                                                                                                                                                                          |
| $\mathcal{E}(\mathfrak{B}) \subset \mathfrak{B}$                                      | Effect space of $\mathfrak{B}$                                                                                                                                                                                                                                                                  |
| $\mathcal{E}(\mathfrak{B}_L) \subset \mathfrak{B}_L$                                  | Effect space of $\mathfrak{B}_L$                                                                                                                                                                                                                                                                |
| $\mathcal{E}(\mathfrak{B}_{L,N}) \subset \mathfrak{B}_{L,N}$                          | Effect space of $\mathfrak{B}_{L,N}$                                                                                                                                                                                                                                                            |
| $F : Y \rightarrow \mathcal{E}(\mathfrak{A})$                                         | Effect-valued feature map                                                                                                                                                                                                                                                                       |
| $\mathcal{F} : Y \rightarrow \mathcal{E}(\mathfrak{B})$                               | Effect-valued feature map (operator-valued), $\mathcal{F} = \pi \circ F$                                                                                                                                                                                                                        |
| $\mathcal{F}_L : Y \rightarrow \mathcal{E}(\mathfrak{B}_L)$                           | Projected feature map, $\mathcal{F}_L = \mathbf{\Pi}_L \circ \mathcal{F}$                                                                                                                                                                                                                       |
| $\mathbf{F}_L : Y \rightarrow \mathbb{M}_L$                                           | Matrix representation of $\mathcal{F}_L$ in the $\{\phi_l\}$ basis of $H_L$                                                                                                                                                                                                                     |
| $\hat{F}_N : Y \rightarrow \mathcal{E}(\hat{\mathfrak{A}}_N)$                         | Effect-valued feature map (data-dependent)                                                                                                                                                                                                                                                      |
| $\hat{\mathcal{F}}_N : Y \rightarrow \mathcal{E}(\hat{\mathfrak{B}}_N)$               | Effect-valued feature map (operator-valued), $\hat{\mathcal{F}}_N = \hat{\pi}_N \circ \hat{F}_N$                                                                                                                                                                                                |
| $\mathcal{F}_{L,N} : Y \rightarrow \mathcal{E}(\mathfrak{B}_{L,N})$                   | Projected feature map, $\mathcal{F}_{L,N} = \mathbf{\Pi}_{L,N} \circ \hat{\mathcal{F}}_N$                                                                                                                                                                                                       |
| $\mathbf{F}_{L,N} : Y \rightarrow \mathbb{M}_{L,N}$                                   | Matrix representation of $\mathcal{F}_{L,N}$ in the $\{\phi_{l,N}\}$ basis of $H_{L,N}$                                                                                                                                                                                                         |
| $f : X \rightarrow \mathbb{R}$                                                        | Forecast observable, identified with a self-adjoint element of $\mathfrak{A}$                                                                                                                                                                                                                   |
| $\hat{f}_N : X_N \rightarrow \mathbb{R}$                                              | Restriction of $f$ to training trajectory $X_N$ , identified with self-adjoint element of $\hat{\mathfrak{A}}_N$ ; training values $f_n = f(x_n)$                                                                                                                                               |
| $H = L^2(X, \mu)$                                                                     | Hilbert space associated with the invariant measure                                                                                                                                                                                                                                             |
| $H_L \subset H$                                                                       | $L$ -dimensional subspace spanned by leading $L$ eigenfunctions $\phi_l$ of $K$                                                                                                                                                                                                                 |
| $\hat{H}_N = L^2(X, \mu_N)$                                                           | Hilbert space associated with the sampling measure                                                                                                                                                                                                                                              |
| $H_{L,N} \subset \hat{H}_N$                                                           | $L$ -dimensional subspace spanned by leading $L$ eigenfunctions $\phi_{l,N}$ of $K_N$                                                                                                                                                                                                           |
| $h : X \rightarrow Y$                                                                 | Observation map                                                                                                                                                                                                                                                                                 |
| $K : H \rightarrow H$                                                                 | Kernel integral operator associated with $k$                                                                                                                                                                                                                                                    |
| $k : X \times X \rightarrow \mathbb{R}$                                               | Pullback kernel from training data space, $k(x, x') = \kappa(z(x), z(x'))$                                                                                                                                                                                                                      |
| $K_N : H_N \rightarrow H_N$                                                           | Kernel integral operator associated with $k_N$                                                                                                                                                                                                                                                  |
| $\mathbf{K}_N$                                                                        | $N \times N$ real matrix representing $K_N$                                                                                                                                                                                                                                                     |
| $k_N : X \times X \rightarrow \mathbb{R}$                                             | Data-dependent pullback kernel from training data space, $k_N(x, x') = \kappa_N(z(x), z(x'))$                                                                                                                                                                                                   |
| $L$                                                                                   | Hilbert space dimension                                                                                                                                                                                                                                                                         |
| $\mathbb{M}_L$                                                                        | Algebra of $L \times L$ complex matrices                                                                                                                                                                                                                                                        |
| $\mathfrak{M}_n$                                                                      | Algebra of bounded operators on $\mathbb{B}_n$ , equipped with operator norm $\ A\ _{\mathfrak{M}_n}$                                                                                                                                                                                           |
| $n$                                                                                   | Number of qubits                                                                                                                                                                                                                                                                                |
| $N$                                                                                   | Number of training samples                                                                                                                                                                                                                                                                      |
| $P^t : \mathfrak{A}^* \rightarrow \mathfrak{A}^*$                                     | Transfer operator on the dual of $\mathfrak{A}$ , $P^t \alpha = \alpha \circ U^t$ ; restricts to $P^t : S(\mathfrak{A}) \rightarrow S(\mathfrak{A})$ and $P^t : S_*(\mathfrak{A}) \rightarrow S_*(\mathfrak{A})$                                                                                |
| $\mathcal{P}^t : \mathfrak{B}^* \rightarrow \mathfrak{B}^*$                           | Transfer operator on the dual of $\mathfrak{B}$ , $\mathcal{P}^t \gamma = \gamma \circ U^t$ ; restricts to $\mathcal{P}^t : S(\mathfrak{B}) \rightarrow S(\mathfrak{B})$ and $\mathcal{P}^t : S_*(\mathfrak{B}) \rightarrow S_*(\mathfrak{B})$                                                  |
| $\mathcal{P}_L^{(t)} : \mathfrak{B}_L^* \rightarrow \mathfrak{B}_L^*$                 | Projected transfer operator, $\mathcal{P}_L^{(t)} \gamma = \gamma \circ U_L^{(t)}$ ; identified with $\mathcal{P}_L^{(t)} : \mathfrak{B}_L^* \rightarrow \mathfrak{B}_L^*$ , restricts to $\mathcal{P}_L^{(t)} : S(\mathfrak{B}_L) \rightarrow S(\mathfrak{B}_L)$                               |
| $\mathcal{P}_{L,N}^{(q)} : \hat{\mathfrak{B}}_N^* \rightarrow \hat{\mathfrak{B}}_N^*$ | Transfer operator, $\mathcal{P}_{L,N}^{(q)} \gamma = \gamma \circ U_{L,N}^{(q)}$ ; identified with $\mathcal{P}_{L,N}^{(q)} : \hat{\mathfrak{B}}_N^* \rightarrow \hat{\mathfrak{B}}_N^*$ , restricts to $\mathcal{P}_{L,N}^{(q)} : S(\hat{\mathfrak{B}}_N) \rightarrow S(\hat{\mathfrak{B}}_N)$ |
| $\mathbb{P}_{E,p} : \mathcal{B}(\mathbb{R}) \rightarrow [0, 1]$                       | Probability distribution induced by PVM $E : \mathcal{B}(\mathbb{R}) \rightarrow \mathfrak{A}$ given $\omega_p \in S_*(\mathfrak{A})$ ; shorthand notation $\mathbb{P}_{f,p} \equiv P_{E_f,p}$                                                                                                  |
| $\mathbb{P}_{E,p} : \mathcal{B}(\mathbb{R}) \rightarrow [0, 1]$                       | Probability distribution induced by PVM $E : \mathcal{B}(\mathbb{R}) \rightarrow \mathfrak{B}$ given $\omega_p \in S_*(\mathfrak{B})$ ; shorthand notation $\mathbb{P}_{\pi f,p} \equiv P_{E_{\pi f},p}$                                                                                        |
| $S_0, \dots, S_{M-1} \subseteq \mathbb{R}$                                            | Spectral bins (intervals) for evaluation of forecast distribution                                                                                                                                                                                                                               |
| $S(\mathfrak{A}) \subset \mathfrak{A}^*$                                              | State space of $\mathfrak{A}$                                                                                                                                                                                                                                                                   |
| $S_*(\mathfrak{A}) \subset S(\mathfrak{A})$                                           | Space of normal states of $\mathfrak{A}$                                                                                                                                                                                                                                                        |
| $S(\mathfrak{B}) \subset \mathfrak{B}^*$                                              | State space of $\mathfrak{B}$                                                                                                                                                                                                                                                                   |
| $S_*(\mathfrak{B}) \subset S(\mathfrak{B})$                                           | Space of normal states of $\mathfrak{B}$                                                                                                                                                                                                                                                        |
| $S_C(\mathfrak{B}) \subset S_*(\mathfrak{B})$                                         | Normal states given by linear combinations of pure states with uniformly bounded continuous state vectors                                                                                                                                                                                       |
| $S(\mathfrak{B}_L)$                                                                   | State space of $\mathfrak{B}_L$                                                                                                                                                                                                                                                                 |
| $S(\mathfrak{B}_{L,N})$                                                               | State space of $\mathfrak{B}_{L,N}$                                                                                                                                                                                                                                                             |

Table S2. Symbols used in the main text and SI Appendix (continues from Table S1).

| Symbol                                                              | Meaning                                                                                                                                                                                         |
|---------------------------------------------------------------------|-------------------------------------------------------------------------------------------------------------------------------------------------------------------------------------------------|
| $U^t : H \rightarrow H$                                             | Koopman operator, $U^t f = f \circ \Phi^t$ ; restricts to $U^t : \mathfrak{A} \rightarrow \mathfrak{A}$                                                                                         |
| $\tilde{U}^t : H \rightarrow H$                                     | Koopman operator on continuous functions, $U^t f = f \circ \Phi^t$                                                                                                                              |
| $\mathcal{U}^t : \mathfrak{B} \rightarrow \mathfrak{B}$             | Induced Koopman operator, $\mathcal{U}^t A = U^t A U^{t*}$                                                                                                                                      |
| $U_L^{(t)} : H \rightarrow H$                                       | Projected Koopman operator, $U_L^{(t)} = \Pi_L U^t$ ; identified with operator $U_L^{(t)} : H_L \rightarrow H_L$                                                                                |
| $\mathcal{U}_L^{(t)} : \mathfrak{B} \rightarrow \mathfrak{B}$       | Projected Koopman operator, $\mathcal{U}_L^{(t)} A = U_L^{(t)} A U_L^{(t)*}$ ; identified with operator $\mathcal{U}_L^{(t)} : \mathfrak{B}_L \rightarrow \mathfrak{B}_L$                       |
| $U_L^{(t)}$                                                         | $L \times L$ real matrix representing $U_L^{(t)}$ in the $\{\phi_l\}$ basis of $H_L$                                                                                                            |
| $\hat{U}_N^q : H_N \rightarrow H_N$                                 | Shift operator                                                                                                                                                                                  |
| $U_{L,N}^{(q)} : H_{L,N} \rightarrow H_{L,N}$                       | Projected shift operator, $U_{L,N}^{(q)} = \Pi_{L,N} \hat{U}_N^q$ ; identified with operator $U_{L,N}^{(q)} : H_{L,N} \rightarrow H_{L,N}$                                                      |
| $\mathcal{U}_{L,N}^{(q)} : \mathfrak{B} \rightarrow \mathfrak{B}$   | Projected shift operator, $\mathcal{U}_{L,N}^{(q)} A = U_{L,N}^{(q)} A U_{L,N}^{(q)*}$ ; identified with operator $\mathcal{U}_{L,N}^{(q)} : \mathfrak{B}_{L,N} \rightarrow \mathfrak{B}_{L,N}$ |
| $U_{L,N}^{(q)}$                                                     | $L \times L$ real matrix representing $U_{L,N}^{(q)}$ in the $\{\phi_{l,N}\}$ basis of $H_{L,N}$                                                                                                |
| $W_{L,N} : H_{L,N} \rightarrow \mathbb{B}_n$                        | Unitary mapping into quantum computational Hilbert space                                                                                                                                        |
| $\mathcal{W}_{L,N} : \mathfrak{B}_{L,N} \rightarrow \mathfrak{M}_n$ | Induced unitary, $\mathcal{W}_{L,N} A = W_{L,N} A W_{L,N}^*$                                                                                                                                    |
| $X$                                                                 | Dynamical state space                                                                                                                                                                           |
| $X_N \subset X$                                                     | Training trajectory $X_N = \{x_0, \dots, x_{N-1}\}$ ; training dynamical states $x_n = \Phi^{n \Delta t}(x_0)$                                                                                  |
| $Y$                                                                 | Observations space; training observations $y_n = h(x_n)$                                                                                                                                        |
| $Z$                                                                 | Training data space; training data $z_n = z(x_n)$                                                                                                                                               |
| $z : X \rightarrow Z$                                               | Map into training data space                                                                                                                                                                    |
| $\Gamma : S_*(\mathfrak{A}) \rightarrow S_*(\mathfrak{B})$          | Embedding of normal states of $\mathfrak{A}$ into normal states of $\mathfrak{B}$                                                                                                               |
| $\Delta t$                                                          | Sampling interval                                                                                                                                                                               |
| $\delta_x$                                                          | Dirac $\delta$ -measure supported at a point $x$                                                                                                                                                |
| $\epsilon$                                                          | Kernel bandwidth parameter                                                                                                                                                                      |
| $\zeta \in \mathbb{B}_n$                                            | Quantum computational state vector                                                                                                                                                              |
| $\eta_{\text{bump}} : \mathbb{R} \rightarrow \mathbb{R}$            | Bump shape function                                                                                                                                                                             |
| $\eta_{\text{gauss}} : \mathbb{R} \rightarrow \mathbb{R}$           | Gaussian shape function                                                                                                                                                                         |
| $\iota : C(X) \rightarrow H$                                        | Map from continuous functions to $L^p(X, \mu)$ equivalence class                                                                                                                                |
| $\iota_N : C(X) \rightarrow H_N$                                    | Map from continuous functions to $L^p(X, \mu_N)$ equivalence class                                                                                                                              |
| $\kappa : Z \times Z \rightarrow \mathbb{R}_+$                      | Kernel on training data space                                                                                                                                                                   |
| $\lambda_l$                                                         | Kernel eigenvalue corresponding to $\phi_l$                                                                                                                                                     |
| $\lambda_{l,N}$                                                     | Kernel eigenvalue corresponding to $\phi_{l,N}$                                                                                                                                                 |
| $\mu$                                                               | Invariant measure                                                                                                                                                                               |
| $\mu_N$                                                             | Sampling measure supported on the trajectory $X_N$                                                                                                                                              |
| $\nu_N$                                                             | Pushforward of the sampling measure into data space, $\nu_N = z_*(\mu_N)$                                                                                                                       |
| $\xi \in H$                                                         | Unit vector associated with vector state $\omega_\rho \in S_*(\mathfrak{B})$ , $\rho = \langle \xi, \cdot \rangle \xi$                                                                          |
| $\xi_L \in H_L$                                                     | Unit vector associated with vector state $\omega_{\rho_L} \in S_*(\mathfrak{B})$ , $\rho_L = \langle \xi_L, \cdot \rangle \xi_L$                                                                |
| $\xi_{L,N} \in H_{L,N}$                                             | Unit vector associated with vector state $\omega_{\rho_{L,N}} \in S_*(\mathfrak{B})$ , $\rho_{L,N} = \langle \xi_{L,N}, \cdot \rangle \xi_{L,N}$                                                |
| $\xi_{L,N} \in \mathbb{C}^L$                                        | Column vector representation of $\xi_{L,N}$ in the $\{\phi_{l,N}\}$ basis of $H_{L,N}$                                                                                                          |
| $\Pi_L : H \rightarrow H$                                           | Projection onto $H_L$ ; identified with map $\Pi_L : H \rightarrow H_L$                                                                                                                         |
| $\Pi_L : \mathfrak{B} \rightarrow \mathfrak{B}$                     | Projection onto $\mathfrak{B}_L$ , $\Pi_L A = \Pi_L A \Pi_L$ ; identified with map $\Pi_L : \mathfrak{B} \rightarrow \mathfrak{B}_L$                                                            |
| $\Pi_{L,N} : \hat{H}_N \rightarrow \hat{H}_N$                       | Projection onto $H_{L,N}$ ; identified with map $\Pi_{L,N} : \hat{H}_N \rightarrow H_{L,N}$                                                                                                     |
| $\Pi_{L,N} : \mathfrak{B}_N \rightarrow \mathfrak{B}_N$             | Projection onto $\mathfrak{B}_{L,N}$ , $\Pi_{L,N} A = \Pi_{L,N} A \Pi_{L,N}$ ; identified with map $\Pi_{L,N} : \mathfrak{B}_N \rightarrow \mathfrak{B}_{L,N}$                                  |
| $\pi : \mathfrak{A} \rightarrow \mathfrak{B}$                       | Regular representation of $\mathfrak{A}$                                                                                                                                                        |
| $\tilde{\pi} : C(X) \rightarrow \mathfrak{C}$                       | Regular representation of $C(X)$                                                                                                                                                                |
| $\pi_L : \mathfrak{A} \rightarrow \mathfrak{B}_L$                   | Projected regular representation, $\pi_L = \Pi_L \circ \pi$                                                                                                                                     |
| $\tilde{\pi}_N : \hat{\mathfrak{A}}_N \rightarrow \mathfrak{B}_N$   | Regular representation of $\hat{\mathfrak{A}}_N$                                                                                                                                                |
| $\pi_{L,N} : \mathfrak{A}_N \rightarrow \mathfrak{B}_{L,N}$         | Projected regular representation, $\pi_{L,N} = \Pi_{L,N} \circ \tilde{\pi}_N$                                                                                                                   |
| $\tau$                                                              | Forecast lead time                                                                                                                                                                              |
| $\Phi^t : X \rightarrow X$                                          | Dynamical flow                                                                                                                                                                                  |
| $\phi_l \in H$                                                      | Eigenvectors of $K$ (basis vectors for $H$ and $H_L$ )                                                                                                                                          |
| $\varphi_l \in C(X)$                                                | Continuous representative of $\phi_l$                                                                                                                                                           |
| $\phi_{l,N} \in \hat{H}_N$                                          | Eigenvectors of $K_N$ (basis vectors for $\hat{H}_N$ and $H_{L,N}$ )                                                                                                                            |
| $\varphi_{l,N} \in C(X)$                                            | Continuous representative of $\phi_{l,N}$                                                                                                                                                       |
| $\phi_{l,N} \in \mathbb{R}^N$                                       | Column vector representation of $\phi_{l,N}$                                                                                                                                                    |
| $\chi_S$                                                            | Characteristic function of a set $S$                                                                                                                                                            |
| $\psi : Y \times Y \rightarrow [0, 1]$                              | Kernel on observation space                                                                                                                                                                     |
| $\psi_N : Y \times Y \rightarrow [0, 1]$                            | Data-dependent kernel on observation space                                                                                                                                                      |
| $\omega_p \in S_*(\mathfrak{A})$                                    | Normal state induced by probability density $p \in \mathfrak{A}_*$                                                                                                                              |
| $\omega_\rho \in S_*(\mathfrak{B})$                                 | Normal state induced by density operator $\rho \in \mathfrak{B}_*$                                                                                                                              |
| $\omega_{\rho_L} \in S_*(\mathfrak{B}_L)$                           | Normal state induced by density operator $\rho_L \in \mathfrak{B}_{L,*}$ ; extends to normal state $\omega_{\rho_L} \in S_*(\mathfrak{B}_L)$                                                    |
| $\omega_{\rho_{L,N}} \in S_*(\mathfrak{B}_{L,N})$                   | Normal state induced by density operator $\rho_{L,N} \in \mathfrak{B}_{L,N}$                                                                                                                    |
| $\dagger$                                                           | Hermitian conjugate (complex conjugate transpose)                                                                                                                                               |
| $\cdot$                                                             | Normalized Euclidean inner product on $\mathbb{C}^N$ , $\mathbf{f} \cdot \mathbf{g} = \mathbf{f}^\dagger \mathbf{g} / N$                                                                        |
| $\odot$                                                             | Elementwise array multiplication                                                                                                                                                                |
| $\langle \cdot, \cdot \rangle$                                      | Inner product of $H$                                                                                                                                                                            |
| $\langle \cdot, \cdot \rangle_N$                                    | Inner product of $\hat{H}_N$                                                                                                                                                                    |
| $\langle \cdot, \cdot \rangle_n$                                    | Inner product of $\mathfrak{M}_n$                                                                                                                                                               |

**Table S3. Dataset attributes and QMDA parameters for the L96 multiscale and CCSM4 ENSO experiments.**

|                                                         | L96 Multiscale    | ENSO              |
|---------------------------------------------------------|-------------------|-------------------|
| <b>Dataset attributes</b>                               |                   |                   |
| Number of training samples $N$                          | 40,000            | 15,600            |
| Number of test samples $\hat{N}$                        | 13,200            | 2400              |
| Delay parameter $Q$                                     | 0                 | 5                 |
| Observation space ( $Y$ ) dimension $d$                 | 9                 | 44,414            |
| Training data space ( $Z$ ) dimension $d_Z$             | 9                 | 488,554           |
| <b>Kernel <math>\kappa</math> for basis computation</b> |                   |                   |
| Kernel type                                             | Eq. (S4)          | Eq. (S5)          |
| Neighborhood parameter $k_{nn}$ for bandwidth function  | 400               | 400               |
| Bandwidth range parameters $(J_1, J_2)$                 | $(-40, 40)$       | $(-40, 40)$       |
| Bandwidth exponent parameter                            | $(J_2 - J_1)/200$ | $(J_2 - J_1)/200$ |
| Bandwidth scaling parameter $s_{\kappa}$                | 1                 | 2                 |
| <b>Kernel <math>\psi</math> for data assimilation</b>   |                   |                   |
| Kernel type                                             | Eq. (S25)         | Eq. (S25)         |
| Neighborhood parameter $k_{nn}$ for bandwidth function  | 400               | 400               |
| Bandwidth range parameters $(J_1, J_2)$                 | $(-40, 40)$       | $(-40, 40)$       |
| Bandwidth exponent parameter                            | $(J_2 - J_1)/500$ | $(J_2 - J_1)/500$ |
| Bandwidth scaling parameter $s_{\psi}$                  | 0.6               | 1                 |
| <b>Data assimilation</b>                                |                   |                   |
| Number of basis functions $L$ (Hilbert space dimension) | 2000              | 1000              |
| Number of timesteps $J_o$ per observation               | 1                 | 1                 |
| Number of forecast timesteps $J_f$                      | 150               | 12                |
| <b>Quantum circuit simulation</b>                       |                   |                   |
| Number of qubits $n$                                    | 10                | N/A               |
| Number of shots $M$                                     | $10^6$            | N/A               |

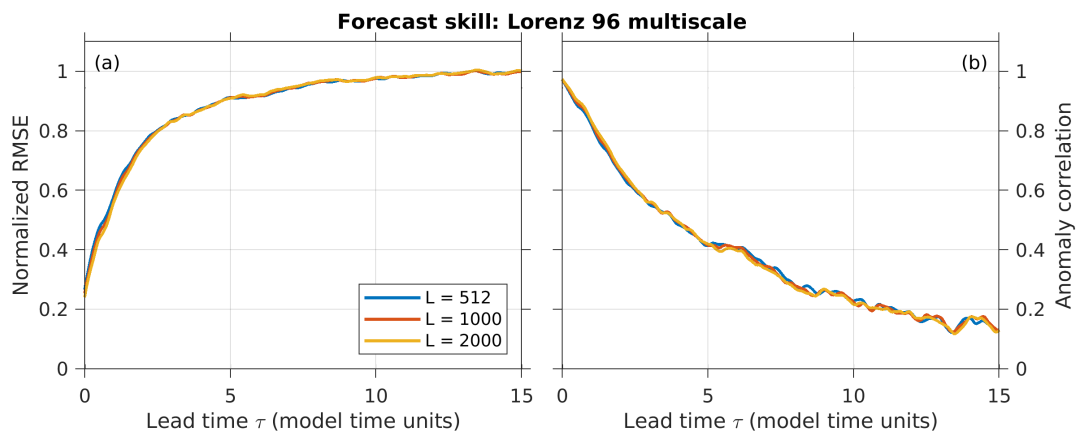

**Fig. S1.** NRMSE (a) and AC (b) skill scores for forecasts of the  $x_1$  variable of the L96 multiscale system, obtained for representative values of the Hilbert space dimension parameter  $L$  in the range 512–2000. The remaining QMDA parameters are listed in Table S3. The case  $L = 2000$  corresponds to Figs. 2 and 3 in the main text.

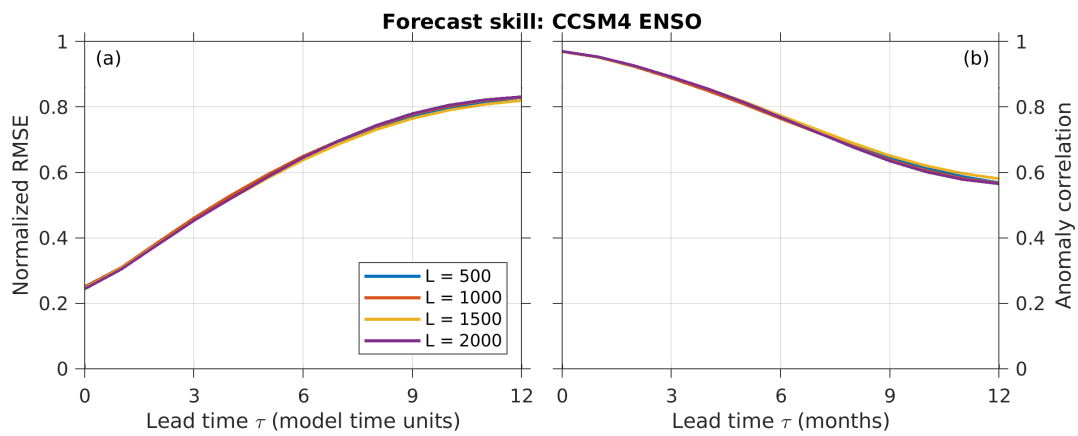

**Fig. S2.** NRMSE (a) and AC (b) skill scores for forecasts of the Niño 3.4 index in CCSM4, obtained for representative values of the Hilbert space dimension parameter in the range 500–2000. The remaining QMDA parameters are listed in Table S3. The case  $L = 1000$  corresponds to Figs. 4 and 5 in the main text.

## 25 1. Assumptions

26 We make the following standing assumption on the dynamical system and forecast observable.

### 27 Assumption 1.

- 28 (a)  $\Phi^t : X \rightarrow X$ ,  $t \in \mathbb{R}$ , is a continuous-time, continuous flow, on a compact metrizable space  $X$ .
- 29 (b)  $\mu$  is an invariant, ergodic, Borel probability measure under  $\Phi^t$ .
- 30 (c) The forecast observable  $f : X \rightarrow \mathbb{R}$  is a real-valued function lying in  $\mathfrak{A} = L^\infty(X, \mu)$ .

31 Note that the support of  $\mu$  is a closed subset of the compact space  $X$ , and thus is compact. Moreover, the compactness  
 32 assumption on  $X$  can be replaced by the weaker assumption that  $\Phi^t$  has a forward-invariant compact set  $X_+$  that contains the  
 33 support of  $\mu$  (which is again necessarily compact). The analysis performed below can be carried over to this setting by replacing  
 34 the space of continuous functions  $C(X)$  (which is a Banach space equipped with the uniform norm when  $X$  is compact) with  
 35  $C(X_+)$ .

36 For the purpose of data-driven approximation, we additionally require:

### 37 Assumption 2.

- 38 (a) For the sampling interval  $\Delta t > 0$ , the discrete-time system induced by the map  $\Phi^{\Delta t} : X \rightarrow X$  is ergodic with respect to  $\mu$ .
- 39 (b) The forecast observable  $f : X \rightarrow \mathbb{R}$  is continuous.
- 40 (c) The observation map  $h : X \rightarrow Y$  is continuous.

41 Assumption 2(a) implies that for  $\mu$ -a.e. initial condition  $x_0 \in X$ , the sampling measures  $\mu_N = \sum_{n=0}^{N-1} \delta_{x_n}/N$  with  
 42  $x_n = \Phi^{n \Delta t}(x_0)$  weak-\* converge to the invariant measure  $\mu$ ; that is,

$$43 \quad \lim_{N \rightarrow \infty} \int_X f d\mu_N = \lim_{N \rightarrow \infty} \frac{1}{N} \sum_{n=0}^{N-1} f(x_n) = \int_X f d\mu, \quad \forall f \in C(X). \quad [S1]$$

44 Henceforth, we will assume for convenience that the states  $x_0, x_1, \dots$  are all distinct—aside from the trivial case that the  
 45 support of  $\mu$  is a singleton set consisting of a fixed point, this assumption holds for  $\mu$ -a.e. initial condition  $x_0$ , and ensures that  
 46 the Hilbert space  $\hat{H}_N = L^2(X, \mu_N)$  has dimension  $N$ .

47 In what follows,

$$48 \quad \langle f, g \rangle = \int_X f^* g d\mu, \quad \langle f, g \rangle_N = \int_X f^* g d\mu_N = \frac{1}{N} \sum_{n=0}^{N-1} f^*(x_n) g(x_n)$$

49 will denote the inner products of  $H$  and  $\hat{H}_N$ , respectively. The Hilbert space  $\hat{H}_N$  is isomorphic to  $\mathbb{C}^N$  equipped with the  
 50 normalized dot product  $\mathbf{f} \cdot \mathbf{g} \equiv \mathbf{f}^\dagger \mathbf{g}/N$ , where  $\mathbf{f}^\dagger$  is the Hermitian conjugate (complex conjugate transpose) of the column  
 51 vector  $\mathbf{f} \in \mathbb{C}^N$ . Under this isomorphism, two elements  $f, g \in \hat{H}_N$  are represented by column vectors  $\mathbf{f} = (f(x_0), \dots, f(x_{N-1}))^\top$   
 52 and  $\mathbf{g} = (g(x_0), \dots, g(x_{N-1}))^\top$ , and we have  $\langle f, g \rangle_N = \mathbf{f} \cdot \mathbf{g}$ .

## 53 2. Finite-dimensional approximation

54 This section provides an overview and pseudocode listings of the data-driven approximation techniques underpinning QMDA.  
 55 We begin with Algorithm S1, which gives a high-level description of the QMDA pipeline employed in the L96 multiscale and  
 56 ENSO experiments presented in the main text. The algorithm is divided up into two parts:

- 57 1. A training phase, which uses the training data  $y_0, \dots, y_{N-1} \in Y$  and  $f_0, \dots, f_{N-1} \in \mathbb{R}$  for the observation map  $h$  and  
 58 forecast observable  $f$ , respectively, to build an orthonormal basis  $\{\phi_{0,N}, \dots, \phi_{L-1,N}\}$  of the Hilbert space  $H_{L,N}$ . The basis  
 59 is used to approximate the Koopman operator  $U^t$  of the dynamical system, the multiplication operator  $\pi f$  representing  
 60 the forecast observable, and the effect-valued map  $\mathcal{F}$  employed in the analysis step.
- 61 2. A prediction phase, which iteratively executes the sequential forecast–analysis steps of QMDA given a test dataset of  
 62 observations  $\hat{y}_0, \dots, \hat{y}_{\hat{N}-1} \in Y$ . The state of the data assimilation system at time  $t_n$  is a vector state of the operator  
 63 algebra  $\mathfrak{B}_{L,N}$ , induced by a unit vector  $\xi_n \in H_{L,N}$ . This vector is represented in the  $\{\phi_{l,N}\}$  basis of  $H_{L,N}$  by a column  
 64 vector  $\boldsymbol{\xi}_n \in \mathbb{C}^L$ .

65 Algorithm S1 depends on a number of lower-level procedures, which we describe in the following subsections.

66 **A. Kernel eigenfunctions.** Following refs. (1–5), we use eigenvectors of kernel integral operators to construct both the  $L$ -  
 67 dimensional Hilbert spaces  $H_L$  and their data-driven counterparts  $H_{L,N}$ . We make the following assumptions on the kernels  
 68 used to define these operators.

### 69 Assumption 3.

- 70 (a)  $k : X \times X \rightarrow \mathbb{R}$  is a continuous, symmetric kernel.
- 71 (b)  $k_0, k_1, \dots : X \times X \rightarrow \mathbb{R}$  is a family of continuous, symmetric kernels such that, as  $N \rightarrow \infty$ ,  $k_N$  converges uniformly to  $k$ .



---

**Algorithm S1** QMDA pipeline employed in the L96 and ENSO experiments described in the main text.

---

**Inputs**

1. Delay embedding parameter  $Q \in \mathbb{N}$ .
2. Hilbert space dimension  $L \in \mathbb{N}$ .
3. Number of spectral bins  $M \in \mathbb{N}$ .
4. Kernel neighborhood parameter  $k_{\text{nn}}$  in  $\mathbb{N}$ .
5. Bandwidth exponent parameter  $a > 0$  and range parameters  $J_1, J_2 \in \mathbb{N}$ .
6. Number of forecast timesteps  $J_f \in \mathbb{N}$ .
7. Training data from observation map,  $y_{-Q}, \dots, y_{N-1+Q} \in Y \equiv \mathbb{R}^d$  with  $y_n = h(x_n)$ .
8. Training data from forecast observable,  $f_0, \dots, f_{N-1+Q} \in \mathbb{R}$  with  $f_n = f(x_n)$ .
9. Observed data  $\hat{y}_0, \dots, \hat{y}_{\hat{N}-1} \in Y$  in test period.

*Require:* All training data are induced by the same sequence of (unknown) time-ordered states  $x_{-Q}, \dots, x_{N-1+Q} \in X$  with  $x_n = \Phi^{n \Delta t}(x_0)$ , taken at a fixed sampling interval  $\Delta t > 0$ .

**Outputs**

1. Mean forecast  $\{\bar{f}_{nj}\}$  for  $n \in \{0, \dots, \hat{N} - 1\}$  and  $j \in \{0, \dots, J_f\}$ , where  $\bar{f}_{nj}$  has initialization time  $t_n = n \Delta t$  in the test period and lead time  $\tau_j = j \Delta t$ .
2. Forecast uncertainty  $\{\sigma_{nj}\}$  for  $n \in \{0, \dots, \hat{N} - 1\}$  and  $j \in \{0, \dots, J_f\}$ , where  $\sigma_{nj}$  has initialization time  $t_n$  and lead time  $\tau_j$ .
3. Spectral bins (intervals)  $S_0, \dots, S_{M-1} \subseteq \mathbb{R}$ .
4. Forecast probability vectors  $\{\mathbf{p}_{nj}\}$  for  $n \in \{0, \dots, \hat{N} - 1\}$  and  $j \in \{0, \dots, J_f\}$ , where  $\mathbf{p}_{nj} = (p_{0nj}, \dots, p_{M-1,nj})$  is the probability that, for initialization time  $t_n$  and lead time  $\tau_j$ , the forecast observable  $f$  lies in  $S_m$ .

**Training phase**

1. Apply Eq. (S6) to the training data  $y_n$  to build the delay-embedded dataset  $z_0, \dots, z_{N-1} \in Z \equiv \mathbb{R}^{(2Q+1)d}$ .
2. Set  $d_Z$  to the Euclidean distance on  $Z$ . Execute Algorithm S2 with inputs  $\{z_n\}_{n=0}^{N-1}$ ,  $d_Z$ , and  $k_{\text{nn}}$  to obtain a kernel bandwidth function  $b_Z : Z \rightarrow \mathbb{R}_+$ .
3. Execute Algorithm S3 with inputs  $\{z_n\}_{n=0}^{N-1}$ ,  $d_Z$ , and  $k_{\text{nn}}$  to obtain basis vectors  $\phi_0, \dots, \phi_{L-1} \in \mathbb{R}^N$  for  $H_{L,N}$ .
4. Execute Algorithm S8 with inputs  $\{f_n\}_{n=0}^{N-1}$  to obtain spectral bins  $S_0, \dots, S_{M-1} \subset \mathbb{R}$ .
5. Execute Algorithm S7 with inputs  $\{f_n\}_{n=0}^{N-1}$ ,  $\{\phi_l\}_{l=0}^{L-1}$ , and  $\{S_m\}_{m=0}^{M-1}$  to obtain the projected multiplication operator  $\mathbf{A} \in \mathbb{M}_L$  representing  $f$  and spectral projectors  $\mathbf{E}_0, \dots, \mathbf{E}_{M-1} \in \mathbb{M}_L$ .
6. For each  $j \in \{1, \dots, J_f\}$ , execute Algorithm S9 with inputs  $j$  and  $\{\phi_l\}_{l=0}^{L-1}$  to obtain Koopman operator matrices  $\mathbf{U}^{(1)}, \dots, \mathbf{U}^{(J_f)} \in \mathbb{M}_L$ .
7. Set  $d_Y$  to the Euclidean distance on  $Y$ . Execute Algorithm S2 with inputs  $\{y_n\}_{n=0}^{N-1}$ ,  $d_Y$ , and  $k_{\text{nn}}$  to obtain a kernel bandwidth function  $b_Y : Y \rightarrow \mathbb{R}_+$ .
8. Define the scaled distance function  $\tilde{d}_Y : Y \times Y \rightarrow \mathbb{R}_+$  with  $\tilde{d}_Y(y, y') = d_Y(y, y') / \sqrt{b_Y(y)b_Y(y')}$ . Execute Algorithm S2 with inputs  $\{y_n\}_{n=0}^{N-1}$ ,  $a$ ,  $J_1, J_2$ ,  $\tilde{d}_Y$ , and  $\eta_{\text{bump}}$  (where  $\eta_{\text{bump}}$  is the bump function from Eq. (S26)) to obtain an optimal bandwidth parameter  $\epsilon_*$ .
9. Define the kernel function  $\psi : Y \times Y \rightarrow [0, 1]$  with  $\psi(y, y') = \eta_{\text{bump}}(\tilde{d}_Y(y, y') / \epsilon_*)$ . Execute Algorithm S12 with inputs  $\psi$ ,  $\{y_n\}_{n=0}^{N-1}$  and  $\{\phi_l\}_{l=0}^{L-1}$  to obtain the effect-valued feature map  $\mathbf{F} : Y \rightarrow \mathbb{M}_L$ .

**Prediction phase**

1. Set the initial state vector  $\boldsymbol{\xi}_0 = (1, 0, \dots, 0)^\top \in \mathbb{C}^L$ .
2. For each  $n \in \{1, \dots, \hat{N} - 1\}$  execute the forecast-analysis cycle in Algorithm S11 with inputs  $J_f$ ,  $J_o = 1$ ,  $\{\mathbf{U}^{(j)}\}_{j=1}^{J_f}$ ,  $\mathbf{A}$ ,  $\{\mathbf{E}_m\}_{m=0}^{M-1}$ ,  $\mathbf{F}$ ,  $\boldsymbol{\xi}_{n-1}$ , and  $\hat{y}_n$ .

**Return:**

- The mean forecasts  $\bar{f}_{n-1,0}, \dots, \bar{f}_{n-1,J_f}$ .
  - The forecast uncertainties  $\sigma_{n-1,0}, \dots, \sigma_{n-1,J_f}$ .
  - The forecast probability vectors  $\mathbf{p}_{n-1,0}, \dots, \mathbf{p}_{n-1,J_f}$ .
  - The posterior state vector  $\boldsymbol{\xi}_n$  given the observation  $y_n$ .
-

72 As we describe below, the kernels  $k_N$  are typically data-dependent kernels obtained by normalization of a fixed (data-  
73 independent) kernel on  $X$ .

74 Defining  $K : H \rightarrow H$  as the integral operator

$$75 \quad Kf = \int_X k(\cdot, x)f(x) d\mu(x),$$

76 we have that  $K$  is a real, self-adjoint, Hilbert-Schmidt operator, and thus there exists a real, orthonormal basis  $\{\phi_0, \phi_1, \dots\}$  of  
77  $H = L^2(X, \mu)$  consisting of eigenvectors of  $K$ ,

$$78 \quad K\phi_l = \lambda_l \phi_l, \quad \lambda_l \in \mathbb{R}, \quad [S2]$$

79 where the eigenvalues  $\lambda_0, \lambda_1, \dots$  are ordered in order of decreasing absolute value and converge to 0 as  $l \rightarrow \infty$ . In the data-driven  
80 setting, we replace  $H$  by the  $N$ -dimensional Hilbert space  $\hat{H}_N$ , and define the integral operator  $K_N : \hat{H}_N \rightarrow \hat{H}_N$  as

$$81 \quad K_N f = \int_X k_N(\cdot, x)f(x) d\mu_N(x) = \frac{1}{N} \sum_{n=0}^{N-1} k_N(\cdot, x_n)f(x_n).$$

82 The operator  $K_N$  has an associated real, orthonormal eigenbasis  $\{\phi_{0,N}, \dots, \phi_{N-1,N}\}$  of  $\hat{H}_N$ , where

$$83 \quad K_N \phi_{l,N} = \lambda_{l,N} \phi_{l,N}, \quad \lambda_{l,N} \in \mathbb{R}, \quad [S3]$$

84 and the eigenvalues  $\lambda_{l,N}$  are ordered again in order of decreasing modulus.

85 An important property of the eigenvectors  $\phi_l$  and  $\phi_{l,N}$  corresponding to nonzero eigenvalues is that they have continuous  
86 representatives. Specifically, assuming that  $\lambda_l$  and  $\lambda_{l,N}$  are nonzero, we define  $\varphi_l, \varphi_{l,N} \in C(X)$  such that

$$87 \quad \varphi_l(x) = \frac{1}{\lambda_l} \int_X k(x, x')\phi_l(x') d\mu(x'), \quad \varphi_{l,N}(x) = \frac{1}{\lambda_{l,N}} \int_X k_N(x, x')\phi_{l,N}(x') d\mu_N(x').$$

88 It then follows from Eq. (S2) and Eq. (S3), respectively, that  $\varphi_l = \phi_l$   $\mu$ -a.e. and  $\varphi_{l,N} = \phi_{l,N}$   $\mu_N$ -a.e. Note that the latter  
89 relation simply means that  $\varphi_{l,N}(x_n) = \phi_{l,N}(x_n)$  for every  $n \in \{0, \dots, N-1\}$ .

90 The following theorem summarizes the spectral convergence of the operators  $K_N$  to  $K$  and the convergence of the associated  
91 basis functions. The results are based on techniques developed in ref. (6). Additional details and proofs for the setting of  
92 ergodic dynamical systems and data-dependent kernels employed in this work can be found, e.g., in refs. (5, 7).

93 **Theorem 1.** *Under Assumptions 1–3, the following hold as  $N \rightarrow \infty$  for  $\mu$ -a.e. initial condition  $x_0 \in X$ .*

- 94 (a) *For each nonzero eigenvalue  $\lambda_l$  of  $K$ , the sequence of eigenvalues  $\lambda_{l,N}$  of  $K_N$  converges to  $\lambda_l$ , including multiplicities.*  
95 (b) *If  $\phi_l \in H$  is an eigenvector of  $K$  corresponding to  $\lambda_l$  with continuous representative  $\varphi_l \in C(X)$ , there exists a sequence  
96 of eigenvectors  $\phi_{l,N}$  of  $K_N$  corresponding to eigenvalue  $\lambda_{l,N}$ , whose continuous representatives  $\varphi_{l,N} \in C(X)$  converge  
97 uniformly to  $\varphi_l$ .*

98 In numerical applications, we use the  $\hat{H}_N \simeq \mathbb{C}^N$  isomorphism to represent the eigenvectors  $\phi_{l,N}$  by  $N$ -dimensional column  
99 vectors  $\phi_{l,N} \in \mathbb{C}^N$  (which are real since the  $\phi_{l,N}$  are real) with  $\phi_{l,N} = (\phi_{l,N}(x_0), \dots, \phi_{l,N}(x_{N-1}))^\top$ . The vectors  $\phi_{l,N}$  are  
100 solutions of the eigenvalue problem

$$101 \quad \mathbf{K}_N \phi_{l,N} = \lambda_{l,N} \phi_{l,N}$$

102 for the  $N \times N$  kernel matrix  $\mathbf{K}_N = [K_{ij,N}]_{i,j=0}^{N-1}$  with  $K_{ij,N} = k_N(x_i, x_j)/N$ . We impose the orthonormality condition  
103  $\phi_{l,N} \cdot \phi_{m,N} = \delta_{l,m}$ , which is equivalent to  $\langle \phi_{l,N}, \phi_{m,N} \rangle_N = \delta_{l,m}$  on  $\hat{H}_N$ .

104 Henceforth, we will assume that for a given choice of basis vectors  $\phi_l$  of  $H$  and so long as  $\lambda_l$  is nonzero, the data-driven  
105 basis vectors  $\phi_{l,N}$  of  $\hat{H}_N$  are chosen such that they converge to  $\phi_l$  as per Theorem 1. This assumption leads to no loss of  
106 generality since every real, orthonormal eigenbasis  $\phi_{l,N}$  can be orthogonally rotated to a basis that converges to  $\phi_l$  without  
107 affecting the results of the computations presented below.

108 **B. Choice of kernel.** Since our training data  $z_n$  are in the space  $Z$ , we employ kernels which are pullbacks of kernels on that  
109 space; specifically, we set  $k(x, x') = \kappa(z(x), z(x'))$  and  $k_N(x, x') = \kappa_N(z(x), z(x'))$ , where  $\kappa : Z \times Z \rightarrow \mathbb{R}$  and  $\kappa_N : Z \times Z \rightarrow \mathbb{R}$   
110 are continuous, symmetric kernels. With this approach, all kernel computations can be executed using the data  $z_n \in Z$  without  
111 knowledge of the underlying dynamical states  $x_n \in X$ .

112 Following ref. (5), we construct the kernels  $\kappa_N$  by applying the bistochastic normalization procedure introduced in ref. (8)  
113 to the family of variable-bandwidth diffusion kernels developed in ref. (9). Using the training data  $z_n$ , we construct a  
114 variable-bandwidth radial basis function kernel  $\tilde{\kappa}_N : Z \times Z \rightarrow \mathbb{R}$  of the form

$$115 \quad \tilde{\kappa}_N(z, z') = \eta_{\text{gauss}} \left( \frac{d(z, z')}{\epsilon_N \sqrt{b_N(z)b_N(z')}} \right), \quad [S4]$$

116 where  $\eta_{\text{gauss}} : \mathbb{R} \rightarrow \mathbb{R}$  is the Gaussian shape function,  $\eta_{\text{gauss}}(u) = e^{-u^2}$ ,  $d : Z \times Z \rightarrow \mathbb{R}_+$  is a distance function (which we  
117 nominally set to the Euclidean when  $Z = \mathbb{R}^d$ ),  $\epsilon_N > 0$  is a bandwidth parameter, and  $b_N : Z \rightarrow \mathbb{R}_+$  is a (data-dependent)

bandwidth function. The construction of the bandwidth function, which resembles a kernel density estimation procedure, is summarized in Algorithm S2. The bandwidth parameter  $\epsilon_N$  is tuned automatically using Algorithm S6, which is described in section 2.C below. In order to have flexibility to adjust the bandwidth parameter around the value computed by the tuner, we introduce a scaling parameter  $s_\kappa > 0$  and set  $\epsilon_N = s_\kappa \epsilon_*$ , where  $\epsilon_*$  is the output of Algorithm S6. In general, we find that the automatic tuning procedure performs well, so  $s_\kappa = 1$  is typically a good choice, but in some cases involving datasets of large intrinsic dimension and sparse sampling, using a somewhat more conservative bandwidth parameter (e.g.,  $s_\kappa = 2$ ) can lead to higher-quality basis functions. Further details on Algorithms S2 and S6 can be found in refs. (1, 9).

---

**Algorithm S2** Kernel bandwidth function.

---

**Inputs**

1. Dataset  $x_0, x_1, \dots, x_{N-1} \in \mathcal{X}$ ;  $\mathcal{X}$  is an arbitrary set.
2. Distance function  $d : \mathcal{X} \times \mathcal{X} \rightarrow \mathbb{R}_+$ .
3. Neighborhood parameter  $k_{\text{nn}} \in \mathbb{N}$ .
4. Bandwidth exponent parameter  $a > 0$  and range parameters  $J_1, J_2 \in \mathbb{N}$ .

**Outputs**

1. Bandwidth function  $b : \mathcal{X} \rightarrow \mathbb{R}_+$ .

**Steps**

1. Construct the function  $r : \mathcal{X} \rightarrow \mathbb{R}_+$ , where  $r^2(x) = \sum_{j=1}^{k_{\text{nn}}} d^2(x, I(x, j)) / k_{\text{nn}}$  and  $I(x, j) \in \{0, \dots, N-1\}$  is the index of the  $j$ -th nearest neighbor of  $x$  in the  $\{x_i\}_{i=0}^{N-1}$  dataset with respect to the distance  $d$ .
  2. Construct the distance-like function  $\tilde{d} : \mathcal{X} \times \mathcal{X} \rightarrow \mathbb{R}$  with  $\tilde{d}(x, x') = d(x, x') / \sqrt{r(x)r(x')}$ .
  3. Execute Algorithm S6 with inputs  $\{x_n\}_{n=0}^{N-1}$ ,  $\tilde{d}$ ,  $\eta_{\text{gauss}}$ ,  $k_{\text{nn}}$ ,  $a$ ,  $J_1$ , and  $J_2$  to obtain an optimal bandwidth  $\epsilon_*$  and dimension estimate  $m_*$ .
  4. Construct the kernel  $\tilde{k} : \mathcal{X} \times \mathcal{X} \rightarrow \mathbb{R}_+$ , where  $\tilde{k}(x, x') = \eta_{\text{gauss}}(\tilde{d}(x, x') / \epsilon_*)$ .
  5. **Return:** The function  $b : \mathcal{X} \rightarrow \mathbb{R}_+$  such that  $b(x) = \sum_{j=0}^{N-1} \tilde{k}(x, x_j) / (N(\pi \epsilon_* r^2(x))^{m_*/2})$ .
- 

Using the kernel  $\tilde{\kappa}_N$ , we perform the sequence of normalization steps described in ref. (8) to obtain a symmetric, positive, positive-definite kernel  $\kappa_N$  which is Markovian with respect to the pushforward  $\nu_N := z_*(\mu_N)$  of the sampling measure on  $Z$ ,

$$\int_Z \kappa_N(z, z') d\nu_N(z') = \frac{1}{N} \sum_{n=0}^{N-1} \kappa_N(z, z_n) = 1, \quad \forall z \in Z.$$

Algorithm S3 describes the computation of the eigenvectors  $\phi_{l,N}$  associated with this kernel. We note that due to the particular form of the normalization leading to  $\kappa_N$ , the eigenvectors  $\phi_{l,N}$  can be computed without explicit formation of the  $N \times N$  kernel matrix  $\mathbf{K}_N$ . Instead, we compute the  $\phi_{l,N}$  through the singular value decomposition (SVD) of an  $N \times N$  kernel matrix  $\tilde{\mathbf{K}}_N = [\tilde{\kappa}_N(z_i, z_j)]_{i,j=0}^{N-1}$  associated with a non-symmetric kernel function  $\tilde{\kappa}_N : Z \times Z \rightarrow \mathbb{R}$  that factorizes  $\mathbf{K}_N$  as  $\mathbf{K}_N = N \tilde{\mathbf{K}}_N \tilde{\mathbf{K}}_N^\top$ . As is common practice in kernel methods, when the kernel matrix  $\tilde{\mathbf{K}}_N$  is too large for our available computational resources, we fix a parameter  $\hat{k}_{\text{nn}} \in \mathbb{N}$  and approximate  $\tilde{\mathbf{K}}_N$  by a sparse matrix obtained by setting the  $N - \hat{k}_{\text{nn}}$  smallest values in each row of  $\tilde{\mathbf{K}}_N$  to 0. The steps leading to  $\tilde{\kappa}_N$  are listed in Algorithm S4. See Appendix B in ref. (5) for further details.

The data-driven basis from Algorithm S3 was used in our L96 multiscale experiments. As noted in the main text, in the ENSO experiments we used a modified version of the algorithm that replaces  $\tilde{\kappa}_N$  from Eq. (S4) with a product kernel that captures covariability between data in  $Z$  and data in a response space  $\hat{Y}$  (in the case of ENSO, a sequence space of Niño 3.4 indices). Specifically, given a function  $\hat{h} : Z \rightarrow \hat{Y}$ , we define  $\tilde{\kappa}_{\hat{h},N} : Z \times Z \rightarrow \mathbb{R}$  as

$$\tilde{\kappa}_{\hat{h},N}(z, z') = \eta_{\text{gauss}} \left( \frac{d(z, z')}{\epsilon_N \sqrt{b_N(z)b_N(z')}} \right) \eta_{\text{gauss}} \left( \frac{d_{\hat{Y}}(\hat{h}(z), \hat{h}(z'))}{\epsilon_{\hat{Y},N} \sqrt{b_{\hat{Y},N}(\hat{h}(z))b_{\hat{Y},N}(\hat{h}(z'))}} \right), \quad [\text{S5}]$$

where  $d_{\hat{Y}} : \hat{Y} \times \hat{Y} \rightarrow \mathbb{R}_+$  is a distance function on  $\hat{Y}$ ,  $\hat{\epsilon}_{\hat{Y},N}$  is a bandwidth parameter, and  $b_{\hat{Y},N} : \hat{Y} \rightarrow \mathbb{R}_+$  is a bandwidth function. The bandwidth function  $b_{\hat{Y}}$  is computed via Algorithm S2 using  $\{\hat{h}(z_0), \dots, \hat{h}(z_N)\}$  as input data, and  $\epsilon_{\hat{Y},N}$  is tuned via Algorithm S6. Once the kernel function  $\tilde{\kappa}_{\hat{h},N}$  is formed, the computation of the associated bistochastic kernel and eigenfunctions proceeds analogously to Algorithm S3. We summarize the entire procedure in Algorithm S5 for completeness.

In addition to the bistochastic kernel from Algorithms S3 and S5, QMDA can be implemented with a variety of kernels, including non-symmetric kernels satisfying a detailed-balance condition (e.g., the family of normalized kernels from the diffusion maps algorithm (10)). Two basic guidelines on kernel choice are that the data-dependent kernels  $k_N$  are regular-enough such that the integral operators  $K_N$  converge spectrally to  $K$  (in the sense of Theorem 1), and the limit kernel  $k$  is “rich-enough” such that all eigenvalues  $\lambda_l$  are strictly positive (i.e.,  $k$  is an  $L^2(\mu)$  integrally strictly-positive kernel (11)). In that case, as  $N$  and  $L$  increase, the eigenvectors  $\phi_{l,N}$  provide a consistent approximation of an orthonormal basis for the entire Hilbert space

---

**Algorithm S3** Orthonormal basis vectors of  $\hat{H}_N$  from variable-bandwidth bistochastic kernel. We suppress  $N$  subscripts from our notation for  $\phi_{l,N}$ .

---

**Inputs**

1. Dataset  $z_0, z_1, \dots, z_{N-1} \in Z$ .
2. Distance function  $d : Z \times Z \rightarrow \mathbb{R}_+$ .
3. Neighborhood parameters  $k_{\text{nn}}, \hat{k}_{\text{nn}} \in \mathbb{N}$ .
4. Bandwidth exponent parameter  $a > 0$  and range parameters  $J_1, J_2 \in \mathbb{N}$ .
5. Bandwidth scaling parameter  $s_\kappa > 0$ .
6. Number of basis vectors  $L \leq N$ .

**Outputs**

1. Column vectors  $\phi_0, \dots, \phi_{L-1} \in \mathbb{R}^N$ .

**Steps**

1. Execute Algorithm S2 with inputs  $\{z_n\}_{n=0}^{N-1}$ ,  $d$ ,  $a$ ,  $J_1$ , and  $J_2$  to obtain a bandwidth function  $b : Z \rightarrow \mathbb{R}_+$ .
  2. Construct the distance-like function  $\tilde{d} : Z \times Z \rightarrow \mathbb{R}_+$  with  $\tilde{d}(z, z') = d(z, z') / \sqrt{b(z)b(z')}$ .
  3. Execute Algorithm S6 with inputs  $\{z_n\}_{n=0}^{N-1}$ ,  $\tilde{d}$ ,  $\eta_{\text{gauss}}$ ,  $a$ ,  $J_1$ , and  $J_2$  to obtain an optimal bandwidth  $\epsilon_*$ .
  4. Construct the kernel  $\tilde{\kappa} : Z \times Z \rightarrow \mathbb{R}_+$  with  $\tilde{\kappa}(z, z') = \eta_{\text{gauss}}(\tilde{d}(z, z') / (s_\kappa \epsilon_*))$ .
  5. Execute Algorithm S4 with inputs  $\{z_n\}_{n=0}^{N-1}$  and  $\tilde{\kappa}$  to obtain a non-symmetric kernel function  $\hat{\kappa} : Z \times Z \rightarrow \mathbb{R}_+$ .
  6. Form the  $N \times N$  kernel matrix  $\hat{K} = [\hat{K}_{ij}]_{i,j=0}^{N-1}$  with  $\hat{K}_{ij} = \hat{\kappa}(z_i, z_j)$ .
  7. If  $\hat{k}_{\text{nn}} < N$ , set the  $N - \hat{k}_{\text{nn}}$  smallest elements in each row of  $\hat{K}$  to 0 and use a sparse array to store  $\hat{K}$ .
  8. **Return:** The leading  $L$  left singular vectors  $\phi_0, \dots, \phi_{L-1}$  of  $\hat{K}$ , arranged in order of decreasing corresponding singular value, and normalized such that  $\|\phi_l\|_2 = \sqrt{N}$ .
- 

**Algorithm S4** Factorization of bistochastic kernel function.

---

**Inputs**

1. Dataset  $x_0, x_1, \dots, x_{N-1} \in \mathcal{X}$ ;  $\mathcal{X}$  is an arbitrary set.
2. Kernel function  $k : \mathcal{X} \times \mathcal{X} \rightarrow \mathbb{R}_+$ .

**Outputs**

1. Non-symmetric kernel function  $\hat{k} : \mathcal{X} \times \mathcal{X} \rightarrow \mathbb{R}$ .

**Steps**

1. Construct the degree function  $d : \mathcal{X} \rightarrow \mathbb{R}_+$ , where  $d(x) = \sum_{j=0}^{N-1} k(x, x_j)$ .
  2. Construct the function  $q : \mathcal{X} \rightarrow \mathbb{R}_+$ , where  $q(x) = \sum_{j=0}^{N-1} k(x, x_j) / d(x_j)$ .
  3. **Return:** The kernel function  $\hat{k} : \mathcal{X} \times \mathcal{X} \rightarrow \mathbb{R}_+$ , where  $\hat{k}(x, x') = k(x, x') / (d(x)q^{1/2}(x'))$ .
- 

150 *H.* The bistochastic kernels  $k_N$  from Algorithm S3 have this property if the map  $z : X \rightarrow Z$  is injective. In the case of the  
 151 delay coordinate map  $z : X \rightarrow Z = Y^{2Q+1}$ ,

$$152 \quad z(x) = (h(\Phi^{-Q \Delta t}(x)), h(\Phi^{(-Q+1) \Delta t}(x)), \dots, \Phi^{Q \Delta t}(x)) \quad [S6]$$

153 injectivity holds for sufficiently large delay parameter  $Q$  under appropriate assumptions on delay-coordinate maps (12).

154 For certain classes of kernels  $k$  constructed from shape functions with rapid decay (e.g., the Gaussian shape function  $\eta_{\text{gauss}}$ ),  
 155 the asymptotic behavior of the eigenfunctions in the limit of vanishing bandwidth parameter  $\epsilon_N$  may be studied using the  
 156 theory of heat kernels (13). Under appropriate conditions (e.g., the support of the invariant measure  $\mu$  is a differentiable  
 157 manifold or a metric measure space), the eigenfunctions are extremizers of a Dirichlet energy induced by the kernel, which  
 158 defines a notion of regularity of functions akin to a Sobolev norm. In such cases, for any given  $L \in \mathbb{N}$ , the set of orthonormal  
 159 vectors  $\{\phi_0, \dots, \phi_{L-1}\}$  (which we will use in section 2.D to define the subspaces  $H_L \subset H$  used in QMDA) is optimal in the  
 160 sense of having maximal regularity with respect to the kernel-induced Dirichlet energy.

161 **C. Bandwidth tuning.** Algorithm S6 is a tuning procedure for bandwidth-dependent kernels  $k : \mathcal{X} \times \mathcal{X} \rightarrow \mathbb{R}_+$  of the form  
 162  $k(x, x') = \kappa(d(x, x')/\epsilon)$ , where  $\mathcal{X}$  is an arbitrary set,  $d : \mathcal{X} \times \mathcal{X} \rightarrow \mathbb{R}_+$  is a distance-like function,  $\eta : \mathbb{R}_+ \rightarrow \mathbb{R}_+$  a positive kernel  
 163 shape function, and  $\epsilon > 0$  a kernel bandwidth parameter. The tuning approach in Algorithm S6 was proposed in ref. (14)  
 164 using scaling arguments for heat-like kernels on manifolds, and was also used in refs. (1, 4, 9). It takes as input a dataset in  $\mathcal{X}$   
 165 and a logarithmic grid of candidate bandwidth values  $\epsilon_j$ , and returns an “optimal” bandwidth  $\epsilon_*$  from this candidate set that  
 166 maximizes a kernel-induced dimension function  $m(\epsilon_j)$  for the dataset. If  $k$  is a heat-like kernel on a Riemannian manifold,  
 167  $m(\epsilon_*)$  is an estimator of the manifold’s dimension, but  $m(\epsilon_*)$  also provides a notion of dimension for non-smooth sets.

---

**Algorithm S5** Orthonormal basis vectors of  $\hat{H}_N$  from variable-bandwidth bistochastic kernel based on product kernel. We suppress  $N$  subscripts from our notation for  $\phi_{l,N}$ .

---

**Inputs**

1. Dataset  $z_0, z_1, \dots, z_{N-1} \in Z$ .
2. Distance function  $d : Z \times Z \rightarrow \mathbb{R}_+$ .
3. Response function  $\hat{h} : Z \rightarrow \hat{Y}$ .
4. Distance function  $d_{\hat{Y}} : \hat{Y} \times \hat{Y} \rightarrow \mathbb{R}_+$ .
5. Neighborhood parameters  $k_{\text{nn}}, \hat{k}_{\text{nn}} \in \mathbb{N}$ .
6. Bandwidth exponent parameter  $a > 0$  and range parameters  $J_1, J_2 \in \mathbb{N}$ .
7. Bandwidth scaling parameter  $s_\kappa > 0$ .
8. Number of basis vectors  $L \leq N$ .

**Outputs**

1. Column vectors  $\phi_0, \dots, \phi_{L-1} \in \mathbb{R}^N$ .

**Steps**

1. Execute Algorithm S2 with inputs  $\{z_n\}_{n=0}^{N-1}$ ,  $d$ ,  $a$ ,  $J_1$ , and  $J_2$  to obtain a bandwidth function  $b : Z \rightarrow \mathbb{R}_+$ .
  2. Construct the distance-like function  $\tilde{d} : Z \times Z \rightarrow \mathbb{R}_+$  with  $\tilde{d}(z, z') = d(z, z') / \sqrt{b(z)b(z')}$ .
  3. Execute Algorithm S6 with inputs  $\{z_n\}_{n=0}^{N-1}$ ,  $\tilde{d}$ ,  $\eta_{\text{gauss}}$ ,  $a$ ,  $J_1$ , and  $J_2$  to obtain an optimal bandwidth  $\epsilon_*$ .
  4. Execute Algorithm S2 with inputs  $\{\hat{h}(z_n)\}_{n=0}^{N-1}$ ,  $d_{\hat{Y}}$ ,  $a$ ,  $J_1$ , and  $J_2$  to obtain a bandwidth function  $b_{\hat{Y}} : \hat{Y} \rightarrow \mathbb{R}_+$ .
  5. Construct the distance-like function  $\tilde{d}_{\hat{Y}} : \hat{Y} \times \hat{Y} \rightarrow \mathbb{R}_+$  with  $\tilde{d}_{\hat{Y}}(\hat{y}, \hat{y}') = d_{\hat{Y}}(\hat{y}, \hat{y}') / \sqrt{b_{\hat{Y}}(\hat{y})b_{\hat{Y}}(\hat{y}' )}$ .
  6. Execute Algorithm S6 with inputs  $\{\hat{h}(z_n)\}_{n=0}^{N-1}$ ,  $\tilde{d}_{\hat{Y}}$ ,  $\eta_{\text{gauss}}$ ,  $a$ ,  $J_1$ , and  $J_2$  to obtain an optimal bandwidth  $\epsilon_{\hat{Y},*}$ .
  7. Construct the product kernel  $\tilde{\kappa}_{\hat{h}} : Z \times Z \rightarrow \mathbb{R}_+$  with  $\tilde{\kappa}_{\hat{h}}(z, z') = \eta_{\text{gauss}}(\tilde{d}(z, z') / (s_\kappa \epsilon_*)) \eta_{\text{gauss}}(\tilde{d}_{\hat{Y}}(\hat{h}z, \hat{h}z') / (s_\kappa \epsilon_{\hat{Y},*}))$ .
  8. Execute Algorithm S4 with inputs  $\{z_n\}_{n=0}^{N-1}$  and  $\tilde{\kappa}_{\hat{Y}}$  to obtain a non-symmetric kernel function  $\hat{\kappa} : Z \times Z \rightarrow \mathbb{R}_+$ .
  9. Form the  $N \times N$  kernel matrix  $\hat{K} = [\hat{K}_{ij}]_{i,j=0}^{N-1}$  with  $\hat{K}_{ij} = \hat{\kappa}(z_i, z_j)$ .
  10. If  $\hat{k}_{\text{nn}} < N$ , set the  $N - \hat{k}_{\text{nn}}$  smallest elements in each row of  $\hat{K}$  to 0 and use a sparse array to store  $\hat{K}$ .
  11. **Return:** The leading  $L$  left singular vectors  $\phi_0, \dots, \phi_{L-1}$  of  $\hat{K}$ , arranged in order of decreasing corresponding singular value, and normalized such that  $\|\phi_l\|_2 = \sqrt{N}$ .
- 

168 **D. Finite-dimensional Hilbert spaces and operator approximation.** Given the basis vectors  $\phi_l$  and  $\phi_{l,N}$  from section 2.A, we  
169 define the  $L$ -dimensional Hilbert spaces

$$170 \quad H_L = \text{span}\{\phi_0, \dots, \phi_{L-1}\} \subset H, \quad H_{L,N} = \text{span}\{\phi_{0,N}, \dots, \phi_{L-1,N}\} \subset \hat{H}_N,$$

171 where in the case of  $H_{L,N}$   $L$  is at most  $N$ . As in the main text, we let  $\Pi_L : H \rightarrow H$  and  $\Pi_{L,N} : \hat{H}_N \rightarrow \hat{H}_N$  be the  
172 orthogonal projections on  $H$  and  $\hat{H}_N$ , respectively, with  $\text{ran } \Pi_L = H_L$  and  $\text{ran } \Pi_{L,N} = H_{L,N}$ . We also let  $\mathbf{\Pi}_L : \mathfrak{B} \rightarrow \mathfrak{B}$   
173 and  $\mathbf{\Pi}_{L,N} : \mathfrak{B}_N \rightarrow \mathfrak{B}_N$  be the induced projections on the operator algebras  $\mathfrak{B} = B(H)$  and  $\mathfrak{B}_N = B(\hat{H}_N)$ , defined as  
174  $\mathbf{\Pi}_L A = \Pi_L A \Pi_L$  and  $\mathbf{\Pi}_{L,N} A = \Pi_{L,N} A \Pi_{L,N}$ , respectively. Defining  $\mathfrak{B}_L = \text{ran } \mathbf{\Pi}_L$ , we can canonically identify  $\mathfrak{B}_L$  with the  
175 subalgebra of  $\mathfrak{B}$  consisting of all operators  $A$  satisfying  $\ker A \supseteq H_L$  and  $\text{ran } A \subseteq H_L$ . The space  $\mathfrak{B}_{L,N} := \text{ran } \mathbf{\Pi}_{L,N}$  can  
176 be canonically identified with a subalgebra of  $\mathfrak{B}_N$  in a similar manner. We will be making these identifications whenever  
177 convenient.

178 Within this setting, we are interested in the following two types of operator approximation, respectively described in  
179 subsections 2.D.1 and 2.D.2.

- 180 1. Approximation of an operator  $A \in \mathfrak{B}$  by a finite-rank operator  $A_L \in \mathfrak{B}_L$ .
- 181 2. Approximation of  $A_L \in \mathfrak{B}_L$  by an operator  $A_{L,N} \in \mathfrak{B}_{L,N}$ .

182 Intuitively, we think of an approximation of the first type listed above as a ‘‘compression’’ of an operator  $A \in \mathfrak{B}$  of possibly  
183 infinite rank to an operator  $A_L \in \mathfrak{B}_L \subset \mathfrak{B}$  of at most rank  $L$ . Approximations of the second type are of a fundamentally  
184 different nature since there are no inclusion relationships between  $\mathfrak{B}_L$  and  $\mathfrak{B}_{L,N}$ . One can think instead of such approximations  
185 as data-driven approximations of the *representation* of an operator in a basis.

186 **D.1. Operator compression.** Given  $A \in \mathfrak{B}$ , we define  $A_L \in \mathfrak{B}_L$  as

$$187 \quad A_L := \mathbf{\Pi}_L A = \Pi_L A \Pi_L, \tag{S7}$$

188 Since  $\{\phi_0, \phi_1, \dots\}$  is an orthonormal basis of  $H$ , the projections  $\Pi_L$  converge strongly to the identity; that is, for every  
189  $f \in H$ , we have  $\lim_{L \rightarrow \infty} (\Pi_L - I)f = 0$ , where the limit is taken in the norm of  $H$ . As a result, the operators  $\check{A}_L := A \Pi_L$   
190 converge strongly to  $A$ ,  $\lim_{L \rightarrow \infty} (\check{A}_L - A)f = 0$  for all  $f \in H$ . It then follows from standard results in functional analysis that  
191  $A_L = \Pi_L \check{A}_L$  converges strongly to  $A$ , i.e.,

$$192 \quad \lim_{L \rightarrow \infty} A_L f = A f, \quad \forall f \in H. \tag{S8}$$

---

**Algorithm S6** Tuning of bandwidth-dependent kernels.

---

**Inputs**

1. Dataset  $x_0, x_1, \dots, x_{N-1} \in \mathcal{X}$ ;  $\mathcal{X}$  is an arbitrary set.
2. Bandwidth exponent parameter  $a > 0$  and range parameters  $J_1, J_2 \in \mathbb{N}$ .
3. Distance-like function  $d : \mathcal{X} \times \mathcal{X} \rightarrow \mathbb{R}_+$ .
4. Kernel shape function  $\eta : \mathbb{R}_+ \rightarrow \mathbb{R}_+$ .

**Outputs**

1. Optimal bandwidth  $\epsilon_* > 0$ .
2. Estimated dataset dimension  $m_* \geq 0$ .

**Steps**

1. Compute the  $N \times N$  pairwise distance matrix  $\mathbf{D} = [D_{ij}]_{i,j=0}^{N-1}$  with  $D_{ij} = d(x_i, x_j)$ .
2. Generate logarithmic grid  $\{\epsilon_j\}_{j=J_1}^{J_2}$  with  $\epsilon_j = 2^{aj}$ .
3. For each  $j \in \{J_1, \dots, J_2\}$ , compute the kernel sum  $S(\epsilon_j) = \sum_{i,l=0}^{N-1} K_{il}/N^2$ , where  $K_{il} = \eta(D_{il}/\epsilon_j)$ .
4. For each  $j \in \{J_1 + 1, \dots, J_2 - 1\}$ , compute the logarithmic derivative

$$m(\epsilon_j) = \frac{\log S_{j+1} - \log S_{j-1}}{\log \epsilon_{j+1} - \log \epsilon_{j-1}} = \frac{\log(S_{j+1}/S_{j-1})}{2a}.$$

5. **Return:**  $\epsilon_* = \operatorname{argmax}_{\epsilon_j \in \{\epsilon_{J_1}, \dots, \epsilon_{J_2}\}} m(\epsilon_j)$  and  $m_* = m(\epsilon_*)$ .
- 

193 As we will see below, this type of strong operator convergence is sufficient to deduce convergence of the matrix mechanical  
194 formulation of data assimilation based on  $\mathfrak{B}_L$  to the infinite-dimensional quantum mechanical level based on  $\mathfrak{B}$  (see the rows  
195 labeled  $\textcircled{M}$  and  $\textcircled{Q}$  in the schematic of Fig. 1).

196 **D.2. Data-driven operator approximation.** In order to facilitate approximation of operators in  $\mathfrak{B}_L$  by operators in  $\mathfrak{B}_{L,N}$ , we use  
197 operators acting on the Banach space of continuous functions  $C(X)$  as intermediate approximations. In what follows, we will  
198 let  $\iota : C(X) \rightarrow H$  and  $\iota_N : C(X) \rightarrow \hat{H}_N$  be the canonical linear maps that map continuous functions to their  $L^2$  equivalence  
199 classes in  $H$  and  $\hat{H}_N$ , respectively. In addition, we let  $\mathfrak{C} = B(C(X))$  be the unital Banach algebra of bounded linear operators  
200 on  $C(X)$ . We assume  $L \in \mathbb{N}$  is chosen such that the eigenvalues  $\lambda_{L-1}$  and  $\lambda_{L-1,N}$  of  $K$  and  $K_N$  from Eq. (S2) and Eq. (S3),  
201 respectively, are nonzero. This means that all elements of  $H_L$  and  $H_{L,N}$  have continuous representatives.

202 With these definitions and assumptions, we restrict attention to approximation of operators  $A_L \in \mathfrak{B}_{L,N}$  which are obtained  
203 by applying Eq. (S8) to operators  $A \in \mathfrak{B}$  that satisfy

$$204 \quad A \circ \iota = \iota \circ \tilde{A}, \quad [\text{S9}]$$

205 for some  $\tilde{A} \in \mathfrak{C}$ . In addition, we assume that there is a uniformly bounded family of operators  $\hat{A}_N \in \mathfrak{B}_N$  that satisfy an  
206 approximate version of Eq. (S9) in the following sense: For every  $f \in C(X)$ , the norm of the residual  $(\hat{A}_N \circ \iota_N - \iota_N \circ \tilde{A})f$   
207 converges to 0. That is, we require

$$208 \quad \lim_{N \rightarrow \infty} \|R_N f\|_{\hat{H}_N} = 0, \quad R_N = \hat{A}_N \circ \iota_N - \iota_N \circ \tilde{A}, \quad \forall f \in C(X), \quad [\text{S10}]$$

209 where the operators  $\hat{A}_N$  satisfy the uniform norm bound

$$210 \quad \|\hat{A}_N\|_{\mathfrak{B}_N} \leq a, \quad [\text{S11}]$$

211 for a constant  $a$ . As we will see in the ensuing subsections, under Assumption 2, all operators employed in QMDA satisfy Eq. (S9),  
212 Eq. (S10), and Eq. (S11).

213 We have the following approximation lemma for the matrix elements of  $A$  in terms of the matrix elements of  $\hat{A}_N$ .

214 **Lemma 2.** *Suppose that  $A \in \mathfrak{B}$ ,  $\hat{A}_N \in \mathfrak{B}_N$ , and  $\tilde{A} \in \mathfrak{C}$  satisfy Eq. (S9), Eq. (S10), and Eq. (S11). Then, under Assumptions 1  
215 and 2, and with the notation and assumptions of section 2.A, the matrix elements of  $\hat{A}_N$  in the  $\{\phi_{i,N}\}$  bases of  $\hat{H}_N$  converge  
216 almost surely to the matrix elements of  $A$  in the  $\{\phi_i\}$  basis of  $H$ . That is, for  $\mu$ -a.e. initial condition  $x_0 \in X$ , and every  $i, j \in \mathbb{N}$   
217 such that  $\lambda_i, \lambda_j \neq 0$ ,*

$$218 \quad \lim_{N \rightarrow \infty} \langle \phi_{i,N}, \hat{A}_N \phi_{j,N} \rangle_N = \langle \phi_i, A \phi_j \rangle.$$

219 *Proof.* See subsection 2.D.3. □

220 Let  $A_{ij} = \langle \phi_i, A \phi_j \rangle$  and  $A_{ij,N} = \langle \phi_{i,N}, \hat{A}_N \phi_{j,N} \rangle_N$ . The convergence of  $A_{ij,N}$  to  $A_{ij}$  from Lemma 2 is not uniform with  
221 respect to  $i, j \in \mathbb{N}$ . However, restricting  $i$  and  $j$  to the finite index set  $\{0, \dots, L-1\}$  associated with the basis vectors of the  
222 finite-dimensional spaces  $H_L$  and  $H_{L,N}$  makes the convergence of  $\hat{A}_{ij,N}$  to  $\hat{A}_{ij}$  uniform, and we can conclude that the matrix  
223 representations of the projected operators  $A_{L,N} = \mathbf{\Pi}_{L,N} \hat{A}_N$  converge to the matrix representation of  $A_L = \mathbf{\Pi}_L A$ .

224 **Corollary 3.** *With notation as above, let  $\mathbf{A}_L = [A_{ij}]_{i,j=0}^{L-1}$  and  $\mathbf{A}_{L,N} = [A_{ij,N}]_{i,j=0}^{L-1}$  be the  $L \times L$  matrix representations of*  
 225  *$A_L$  and  $A_{L,N}$  in the  $\{\phi_l\}$  and  $\{\phi_{l,N}\}$  bases of  $H_L$  and  $H_{L,N}$ , respectively. Then, for  $\mu$ -a.e. initial condition  $x_0$ , we have*  
 226  *$\lim_{N \rightarrow \infty} \mathbf{A}_{L,N} = \mathbf{A}_L$  in any matrix norm.*

**D.3. Proof of Lemma 2.** Recall from section 2.A that the  $\phi_{i,N}$  have continuous representatives  $\varphi_{i,N}$  which converge  $\mu$ -a.s. to the continuous representatives  $\varphi_i$  of  $\phi_i$  in the uniform norm of  $C(X)$ . Note also that for every  $N \in \mathbb{N}$ ,  $\iota_N : C(X) \rightarrow \hat{H}_N$  has unit operator norm. Using these facts, we get

$$\begin{aligned} |\langle \phi_{i,N}, \hat{A}_N \phi_{j,N} \rangle_N - \langle \phi_i, A \phi_j \rangle| &= |\langle \phi_{i,N}, \hat{A}_N \iota_N \varphi_{j,N} \rangle_N - \langle \phi_i, A \phi_j \rangle| \\ &\leq |\langle \phi_{i,N}, \hat{A}_N \iota_N (\varphi_{j,N} - \varphi_j) \rangle_N| + |\langle \phi_{i,N}, \hat{A}_N \iota_N \varphi_j \rangle_N - \langle \phi_i, A \phi_j \rangle| \\ &\leq a \|\varphi_{j,N} - \varphi_j\|_{C(X)} + |\langle \phi_{i,N}, \hat{A}_N \iota_N \varphi_j \rangle_N - \langle \phi_i, A \phi_j \rangle|. \end{aligned} \quad [\text{S12}]$$

Moreover, we have

$$\begin{aligned} |\langle \phi_{i,N}, \hat{A}_N \iota_N \varphi_j \rangle_N - \langle \phi_i, A \phi_j \rangle| &= |\langle \phi_{i,N}, \iota_N \tilde{A} \varphi_j \rangle_N + \langle \phi_{i,N}, \iota_N R_N \varphi_j \rangle_N - \langle \phi_i, A \phi_j \rangle| \\ &\leq |\langle \phi_{i,N}, \iota_N \tilde{A} \varphi_j \rangle_N - \langle \phi_i, A \phi_j \rangle| + \|R_N \varphi_j\|_{\hat{H}_N} \\ &= |\langle \iota_N \varphi_{i,N}, \iota_N \tilde{A} \varphi_j \rangle_N - \langle \phi_i, A \phi_j \rangle| + \|R_N \varphi_j\|_{\hat{H}_N} \\ &= |\langle \iota_N (\varphi_{i,N} - \varphi_i), \iota_N \tilde{A} \varphi_j \rangle_N + \langle \iota_N \varphi_i, \iota_N \tilde{A} \varphi_j \rangle_N - \langle \phi_i, A \phi_j \rangle| + \|R_N \varphi_j\|_{\hat{H}_N} \\ &\leq \|\varphi_{i,N} - \varphi_i\|_{C(X)} \|\tilde{A}\|_{\mathfrak{B}} \|\varphi_j\|_{C(X)} + |\langle \iota_N \varphi_i, \iota_N \tilde{A} \varphi_j \rangle_N - \langle \phi_i, A \phi_j \rangle| + \|R_N \varphi_j\|_{\hat{H}_N}. \end{aligned} \quad [\text{S13}]$$

Now, by Eq. (S9) we have

$$\begin{aligned} |\langle \iota_N \varphi_i, \iota_N \tilde{A} \varphi_j \rangle_N - \langle \phi_i, A \phi_j \rangle| &= |\langle \iota_N \varphi_i, \iota_N \tilde{A} \varphi_j \rangle_N - \langle \iota_N \varphi_i, A \iota_N \varphi_j \rangle| = |\langle \iota_N \varphi_i, \iota_N \tilde{A} \varphi_j \rangle_N - \langle \iota_N \varphi_i, \iota_N \tilde{A} \varphi_j \rangle| \\ &= \left| \int_X \varphi_i \tilde{A} \varphi_j d\mu_N - \int_X \varphi_i \tilde{A} \varphi_j d\mu \right|, \end{aligned}$$

227 so by the weak-\* convergence of  $\mu_N$  to  $\mu$  (see Eq. (S1)) it follows that for  $\mu$ -a.e. initial condition  $x_0$ ,

$$228 \lim_{N \rightarrow \infty} |\langle \iota_N \varphi_i, \iota_N \tilde{A} \varphi_j \rangle_N - \langle \phi_i, A \phi_j \rangle| = 0.$$

229 Using this result, the uniform convergence of  $\varphi_{i,N}$  to  $\varphi_i$ , and Eq. (S10) in Eq. (S13), we obtain

$$230 \lim_{N \rightarrow \infty} |\langle \phi_{i,N}, \hat{A}_N \iota_N \varphi_j \rangle_N - \langle \phi_i, A \phi_j \rangle| = 0.$$

231 Finally, using the above and the uniform convergence of  $\varphi_{i,N}$  to  $\varphi_i$  in Eq. (S12), we arrive at

$$232 \lim_{N \rightarrow \infty} |\langle \phi_{i,N}, \hat{A}_N \phi_{j,N} \rangle_N - \langle \phi_i, A \phi_j \rangle| = 0,$$

233 which holds again for  $\mu$ -a.e. initial condition  $x_0$ . This completes the proof of the lemma.

234 **E. Approximation of states.** Let  $\omega_\rho \in S_*(\mathfrak{B})$  be a normal state of  $\mathfrak{B}$  induced by a density operator  $\rho \in \mathfrak{B}_*$ . We recall that the  
 235 predual  $\mathfrak{B}_*$  of  $\mathfrak{B}$  is the space of trace-class operators on  $H$  (denoted as  $B_1(H)$  in the main text), equipped with the trace norm,  
 236  $\|A\|_{\mathfrak{B}_*} = \text{tr} \sqrt{A^* A}$ . In the case of the finite-dimensional algebras  $\mathfrak{B}_L$  and  $\mathfrak{B}_{L,N}$ , the preduals  $\mathfrak{B}_{L*}$  and  $\mathfrak{B}_{L,N*}$ , respectively, can  
 237 be identified with the algebras themselves, but we will continue to distinguish them using  $*$  subscripts since they are equipped  
 238 with a different norm (the trace norm) from the operator norm of the algebras.

239 As in subsection 2.D, we are interested in two types of state approximation, which can be thought of as state compression  
 240 and data-driven approximation, respectively:

- 241 1. Approximation of  $\rho$  by a finite-rank density operator  $\rho_L \in \mathfrak{B}_L$ ; see subsection 2.E.1.
- 242 2. Approximation of  $\rho_L$  by a data-driven density operator  $\rho_{L,N} \in \mathfrak{B}_{L,N*}$ ; see subsection 2.E.2.

243 **E.1. State compression.** Similarly to subsection 2.D.1, for a given density operator  $\rho \in \mathfrak{B}_*$  we define the projected operators  
 244  $\sigma_L = \Pi_L \rho$ . Letting  $C_L = \text{tr} \sigma_L$ , we have  $C_L \leq \text{tr} \rho = 1$ , so in general the  $\sigma_L$  are not density operators. Nevertheless, the  $\sigma_L$   
 245 are positive, finite-rank (and thus trace class) operators that converge to  $\rho$  in trace norm (as opposed to merely strongly; cf.  
 246 Eq. (S8)). Indeed, we have  $\rho - \sigma_L = (I - \Pi_L) \rho (I - \Pi_L)$ , so  $\rho - \sigma_L$  is positive, and

$$247 \|\rho - \sigma_L\|_{\mathfrak{B}_*} = \text{tr}(\rho - \sigma_L) = \sum_{l=L}^{\infty} \langle \phi_l, \rho \phi_l \rangle,$$

248 where the sum in the right-hand side of the last equality is a positive, decreasing function of  $L$ , converging to 0 as  $L \rightarrow \infty$ . We  
 249 also have  $C_L = \sum_{l=0}^{L-1} \langle \phi_l, \rho \phi_l \rangle$ , which implies that  $\lim_{L \rightarrow \infty} C_L = 1$ , and thus that there exists  $L_* \in \mathbb{N}$  such that  $C_L > 0$  for all  
 250  $L > L_*$ . For any such  $L$ ,  $\rho_L := \sigma_L / C_L$  is a density operator, and the sequence  $\rho_L$  converges to  $\rho$  in trace norm,

$$251 \lim_{L \rightarrow \infty} \|\rho_L - \rho\|_{\mathfrak{B}_*} = 0. \quad [\text{S14}]$$

252 In the main text, we denote the map that sends the normal state  $\omega_\rho \in S_*(\mathfrak{B})$  to  $\omega_{\rho_L} \in S_*(\mathfrak{B}_L)$  as  $\Pi'_L(\rho) = \rho_L$ .

253 Let now  $A$  be an element of  $\mathfrak{B}$  with corresponding projected elements  $A_L = \Pi_L A \in \mathfrak{B}_L$  from Eq. (S7). By the cyclic property  
254 of the trace, we have  $\text{tr}(\rho_L A_L) = \text{tr}(\rho_L A)$ , and the trace-norm convergence in Eq. (S14) implies  $\lim_{L \rightarrow \infty} \text{tr}(\rho_L A_L) = \text{tr}(\rho A)$ .  
255 Equivalently, letting  $\omega_\rho \in S_*(\mathfrak{B})$  and  $\omega_{\rho_L}$  be the states of  $\mathfrak{B}$  and  $\mathfrak{B}_L$  induced by  $\rho$  and  $\rho_L$ , respectively, we have

$$256 \quad \lim_{L \rightarrow \infty} \omega_{\rho_L} A_L = \omega_\rho A. \quad [\text{S15}]$$

257 We conclude that evaluation of the projected observables  $A_L$  on the projected states  $\omega_{\rho_L}$  asymptotically recovers the evaluation  
258 of  $A$  on  $\rho$ .

259 **E.2. Data-driven state approximation.** Proceeding analogously to subsection 2.D.2, we seek data-driven approximations of projected  
260 density operators  $\rho_L \in \mathfrak{B}_{L*}$  by density operators  $\rho_{L,N} \in \mathfrak{B}_{L,N*}$  for a subset of density operators  $\rho \in \mathfrak{B}_*$  that behave compatibly  
261 with bounded operators on continuous functions.

262 First, we recall that every density operator  $\rho \in \mathfrak{B}_*$  admits a decomposition (diagonalization) of the form

$$263 \quad \rho = \sum_{j=0}^{\infty} r_j \langle \xi_j, \cdot \rangle \xi_j, \quad [\text{S16}]$$

264 where  $\{\xi_0, \xi_1, \dots\}$  is an orthonormal basis of  $H$ ,  $(r_0, r_1, \dots)$  is an  $\ell^1$  sequence of real numbers in the interval  $[0, 1]$ , and the sum  
265 over  $j$  converges in the trace norm of  $\mathfrak{B}_*$ . In what follows, we shall restrict attention to a subset  $S_C(\mathfrak{B}) \subset S_*(\mathfrak{B})$ , consisting of  
266 all normal states  $\omega_\rho$  of  $\mathfrak{B}$  whose corresponding density operators  $\rho \in \mathfrak{B}_*$  are decomposable as in Eq. (S16) with the following  
267 additional requirement: The orthonormal basis vectors  $\xi_j$  have uniformly bounded continuous representatives; that is, we have

$$268 \quad \xi_j = \iota \tilde{\xi}_j, \quad \tilde{\xi}_j \in C(X), \quad \|\xi_j\|_{C(X)} \leq b,$$

269 for a constant  $b$ . Given such an  $\omega_\rho \in S_C(\mathfrak{B})$ , for each  $N \in \mathbb{N}$  we define the positive operator  $\hat{\sigma}_N : \hat{H}_N \rightarrow \hat{H}_N$ , where

$$270 \quad \hat{\sigma}_N = \sum_{j=0}^{\infty} r_j \langle \hat{\xi}_{j,N}, \cdot \rangle_N \hat{\xi}_{j,N}, \quad \hat{\xi}_{j,N} = \iota_N \tilde{\xi}_j.$$

271 Note that the well-definition of  $\hat{\sigma}_N$  follows from the uniform boundedness of the  $\tilde{\xi}_j$  and the fact that  $(r_0, r_1, \dots)$  is an  $\ell^1$   
272 sequence. It should also be kept in mind that, in general, the  $\sigma_N$  are not normalized as density operators. We then have:

273 **Lemma 4.**

- 274 (a)  $\tilde{\rho} : f \mapsto g$  with  $g(x) = \sum_{j=0}^{\infty} r_j \langle \xi_j, \iota f \rangle \tilde{\xi}_j(x)$  is well-defined as a linear map from  $C(X)$  to itself, and it satisfies  $\iota \circ \tilde{\rho} = \rho \circ \iota$ .  
275 (b) For  $\mu$ -a.e. initial condition  $x_0 \in X$ , the residual  $R_N f = (\iota_N \circ \tilde{\rho})f - (\hat{\sigma}_N \circ \iota_N)f$  satisfies

$$276 \quad \lim_{N \rightarrow \infty} \|R_N f\|_{\hat{H}_N} = 0, \quad \forall f \in C(X).$$

277 *Proof.* See subsection 2.E.3. □

278 It follows from Lemma 4 that Eq. (S9) and Eq. (S10) hold with  $A = \rho$ ,  $\tilde{A} = \tilde{\rho}$ , and  $\hat{A}_N = \hat{\sigma}_N$ . Thus, Lemma 2 and  
279 Corollary 3 apply, and for each  $L \in \mathbb{N}$  such that  $\lambda_{L-1} > 0$ , the matrix representations  $\sigma_{L,N} = [\langle \phi_{i,N}, \hat{\sigma}_N \phi_{j,N} \rangle_N]_{i,j=0}^{L-1}$  of  
280  $\sigma_{L,N} = \Pi_{L,N} \hat{\sigma}_N$  converge to the matrix representation  $\sigma_L = [\langle \phi_i, \rho \phi_j \rangle]_{i,j=0}^{L-1}$  of  $\sigma_L = \Pi_L \rho$ . If, in addition,  $L$  is sufficiently large  
281 such that  $C_L > 0$ , then the density operators  $\rho_{L,N} \in \mathfrak{B}_{L,N*}$  defined as  $\rho_{L,N} = \sigma_{L,N} / C_{L,N}$  with  $C_{L,N} = \text{tr} \sigma_{L,N}$  converge, as  
282  $N \rightarrow \infty$ , in the sense of convergence of the corresponding matrix representations  $\rho_{L,N} = \sigma_{L,N} / C_{L,N}$ , to the density operator  
283  $\rho_L = \sigma_L / C_L$  with matrix representation  $\rho_L = \sigma_L / C_L$ . As we saw in subsection 2.E.1, the latter converges to  $\rho$  as  $L \rightarrow \infty$  in  
284 the trace norm.

285 Combining the results of this section to those of section 2.D, we conclude that QMDA consistently approximates the action  
286 of normal states  $\omega_\rho \in S_C(\mathfrak{B})$  on elements  $A \in \mathfrak{B}$  satisfying Eq. (S9) and Eq. (S10) by the action of the data-driven states  
287  $\omega_{\rho_{L,N}} \in S(\mathfrak{B}_{L,N})$  on the data-driven elements  $A_{L,N} \in \mathfrak{B}_{L,N}$  in the sense of the iterated limit

$$288 \quad \lim_{L \rightarrow \infty} \lim_{N \rightarrow \infty} \omega_{\rho_{L,N}} A_{L,N} = \lim_{L \rightarrow \infty} \omega_{\rho_L} A_L = \omega_\rho A, \quad [\text{S17}]$$

289 where the first equality holds for  $\mu$ -a.e. initial condition  $x_0 \in X$ .

290 **E.3. Proof of Lemma 4.**



291 (a) Fix  $x \in X$  and  $\epsilon > 0$ . For any  $x' \in X$  and  $J \in \mathbb{N}$ , we have

$$292 \quad \left| \sum_{j=J}^{\infty} r_j \langle \xi_j, f \rangle (\tilde{\xi}_j(x) - \tilde{\xi}_j(x')) \right| \leq \|f\|_{C(X)} \sum_{j=J}^{\infty} r_j |\tilde{\xi}_j(x) - \tilde{\xi}_j(x')| \leq 2b\|f\|_{C(X)} \sum_{j=J}^{\infty} r_j.$$

293 Thus, since  $(r_0, r_1, \dots) \in \ell^1$ , there exists  $J$  such that  $\left| \sum_{j=J}^{\infty} r_j \langle \xi_j, f \rangle (\tilde{\xi}_j(x) - \tilde{\xi}_j(x')) \right| < \epsilon$ , for all  $x' \in X$ . We therefore have

$$294 \quad |g(x) - g(x')| = \left| \sum_{j=0}^{\infty} r_j \langle \xi_j, f \rangle (\tilde{\xi}_j(x) - \tilde{\xi}_j(x')) \right| \leq \left| \sum_{j=0}^{J-1} r_j \langle \xi_j, f \rangle (\tilde{\xi}_j(x) - \tilde{\xi}_j(x')) \right| + \epsilon,$$

295 and the continuity of  $g$  follows from the fact that the first term in the right-hand side of the last inequality is a finite sum  
 296 of continuous functions. The boundedness of  $g$  can be shown similarly. The relation  $\iota \circ \tilde{\rho} = \rho \circ \iota$  follows directly from the  
 297 definitions of  $\rho$  and  $\tilde{\rho}$ .

298 (b) Given  $f \in C(X)$ , we have

$$299 \quad \|R_N f\|_{\hat{H}_N} = \|(\iota_N \circ \tilde{\rho})f - (\hat{\sigma}_N \circ \iota_N)f\|_{\hat{H}_N} = \left\| \sum_{j=0}^{\infty} r_j (\langle \xi_j, \iota f \rangle - \langle \hat{\xi}_{j,N}, \iota_N f \rangle_N) \hat{\xi}_{j,N} \right\|_{\hat{H}_N} \leq \sum_{j=0}^{\infty} r_j |\langle \xi_j, \iota f \rangle - \langle \hat{\xi}_{j,N}, \iota_N f \rangle_N| b.$$

300 Since  $|\langle \xi_j, \iota f \rangle - \langle \hat{\xi}_{j,N}, \iota_N f \rangle_N| \leq 2b\|f\|_{C(X)}$  and  $(r_0, r_1, \dots) \in \ell^1$ , for every  $\epsilon > 0$  there exists  $J \in \mathbb{N}$  such that

$$301 \quad \sum_{j=J}^{\infty} r_j |\langle \xi_j, \iota f \rangle - \langle \hat{\xi}_{j,N}, \iota_N f \rangle_N| b < \epsilon/2.$$

302 Moreover, by Eq. (S1), for  $\mu$ -a.e.  $x_0 \in X$  and every  $j \in \mathbb{N}$  we have  $\lim_{N \rightarrow \infty} |\langle \xi_j, \iota f \rangle - \langle \hat{\xi}_{j,N}, \iota_N f \rangle_N| = 0$ , so there exists  $N_* \in \mathbb{N}$   
 303 such that

$$304 \quad \sum_{j=0}^{J-1} r_j |\langle \xi_j, \iota f \rangle - \langle \hat{\xi}_{j,N}, \iota_N f \rangle_N| < \epsilon/2, \quad \forall N > N_*.$$

305 We thus have

$$306 \quad \|R_N f\|_{\hat{H}_N} \leq \sum_{j=0}^{J-1} r_j |\langle \xi_j, \iota f \rangle - \langle \hat{\xi}_{j,N}, \iota_N f \rangle_N| + \sum_{j=J}^{\infty} r_j |\langle \xi_j, \iota f \rangle - \langle \hat{\xi}_{j,N}, \iota_N f \rangle_N| < \epsilon, \quad \forall N > N_*,$$

307 and since  $\epsilon$  was arbitrary, we conclude that  $\lim_{N \rightarrow \infty} \|R_N f\|_{\hat{H}_N} = 0$ . This completes the proof of Lemma 4.

308 **F. Approximation of the forecast observable and its spectral measure.** In this subsection, we examine the QMDA representation  
 309 of the forecast observable  $f \in \mathfrak{A}$  by projected multiplication operators in  $\mathfrak{B}_{L,N}$  which we denote, as in the main text, by  $\pi_{L,N} f$ .  
 310 We are interested in two types of asymptotic consistency of our representations, respectively described in subsections 2.F.1  
 311 and 2.F.2:

- 312 1. Pointwise consistency, meaning that evaluation of  $\pi_{L,N} f$  on the states  $\omega_{\rho_{L,N}}$  from section 2.E should converge to  
 313 evaluation of the multiplication operator  $\pi f \in \mathfrak{B}$  on the state  $\omega_{\rho}$  approximated by  $\omega_{\rho_{L,N}}$ .
- 314 2. Spectral consistency, meaning that the spectral measures of  $\pi_{L,N} f$  should converge to the spectral measure of  $\pi f$  in a  
 315 suitable sense.

316 In QMDA applications, pointwise consistency is required for consistency of the forecast mean and variance with the theoretical  
 317 forecast mean and variance, respectively, from the infinite-dimensional data assimilation system based on the algebra  $\mathfrak{B}$  (i.e.,  
 318 the quantum mechanical level  $\textcircled{Q}$  in Fig. 1). Meanwhile, spectral consistency is required for consistency of the corresponding  
 319 forecast probabilities (denoted as  $\mathbb{P}_{f,t,\tau}$  in the main text).

320 **F.1. Pointwise approximation and its consistency.** For a given trajectory  $X_N := \{x_0, \dots, x_{N-1}\} \subset X$ , let  $\hat{\mathfrak{A}}_N$  denote the finite-  
 321 dimensional, abelian von-Neumann algebra of complex-valued functions on  $X_N$  with respect to pointwise function multiplication  
 322 and complex conjugation, equipped with the maximum norm,  $\|u\|_{\hat{\mathfrak{A}}_N} = \max_{x_n \in X_N} |u(x_n)|$ . As a vector space,  $\hat{\mathfrak{A}}_N$  is isomorphic  
 323 to the Hilbert space  $\hat{H}_N$ , but the two spaces have different norms. Every function  $f : X \rightarrow \mathbb{C}$  induces an element  $\hat{f}_N \in \hat{\mathfrak{A}}_N$  by  
 324 restriction to  $X_N$ ,  $\hat{f}_N(x_n) = f(x_n)$  for all  $n \in \{0, \dots, N-1\}$ . Reusing notation, we will denote the linear map that maps  $f$  to  
 325  $\hat{f}_N$  by  $\iota_N$ . Analogously to  $\pi : \mathfrak{A} \rightarrow \mathfrak{B}$ , the algebra  $\hat{\mathfrak{A}}_N$  has a regular representation  $\hat{\pi}_N : \hat{\mathfrak{A}}_N \rightarrow \mathfrak{B}_{L,N}$  such that, given  $u \in \hat{\mathfrak{A}}_N$ ,  
 326  $\hat{\pi}_N u$  is the multiplication operator by  $u$ , i.e.,  $(\hat{\pi}_N u)v = uv$  for all  $v \in \hat{\mathfrak{A}}_N$ . Moreover, similarly to  $\pi_L : \mathfrak{A} \rightarrow \mathfrak{B}_L$ , for each  
 327  $L \in \{1, \dots, N\}$  we define the linear map  $\pi_{L,N} : \hat{\mathfrak{A}}_N \rightarrow \mathfrak{B}_{L,N}$ ,  $\pi_{L,N} = \mathbf{\Pi}_{L,N} \circ \hat{\pi}_N$ , which maps elements of  $\hat{\mathfrak{A}}_N$  to projected  
 328 multiplication operators in  $\mathfrak{B}_{L,N}$ . Note that, in general, neither  $\pi_L$  nor  $\pi_{L,N}$  are algebra homomorphisms.

329 Consider now the  $C^*$ -algebra of continuous functions on  $X$ ,  $C(X)$ , and its regular representation  $\tilde{\pi} : C(X) \rightarrow \mathfrak{C}$ , where  $\tilde{\pi}\tilde{f}$   
 330 is the multiplication operator by  $\tilde{f}$ , i.e.,  $(\tilde{\pi}f)\tilde{g} = \tilde{f}\tilde{g}$  for all  $\tilde{g} \in C(X)$ . One readily verifies that for every  $f \in C(X)$ ,

$$331 \quad \iota \circ (\tilde{\pi}f) = (\pi f) \circ \iota, \quad \iota_N \circ (\tilde{\pi}f) = (\hat{\pi}_N \hat{f}_N) \circ \iota_N, \quad [\text{S18}]$$

332 where  $f = \iota\tilde{f} \in \mathfrak{A}$  and  $\hat{f}_N = \iota_N\tilde{f} \in \hat{\mathfrak{A}}_N$ . As a result, Eq. (S9) and Eq. (S10) hold for  $A = \pi f$ ,  $\tilde{A} = \tilde{\pi}\tilde{f}$ , and  $\hat{A}_N = \hat{\pi}_N\hat{f}_N$ , and  
 333 by Lemma 2 and Corollary 3 we can consistently approximate  $\pi f$  by the projected multiplication operators  $\pi_L f$  and  $\pi_{L,N}\hat{f}_N$ .

334 In the main text,  $\pi_L f$  and  $\pi_{L,N}\hat{f}_N$  were used to represent the forecast observable  $f$  in the matrix mechanical and data-driven  
 335 formulations of QMDA, respectively. Under Assumption 2, Eq. (S17) and Eq. (S18) together lead to the following consistency  
 336 result for these representations,

$$337 \quad \lim_{L \rightarrow \infty} \lim_{N \rightarrow \infty} \omega_{\rho_{L,N}}(\pi_{L,N}\hat{f}_N) = \lim_{L \rightarrow \infty} \omega_{\rho_L}(\pi_L f) = \omega_{\rho}(\pi f),$$

338 which holds for  $\mu$ -a.e. initial condition  $x_0 \in X$ .

339 As with other linear maps employed in QMDA, in numerical applications we employ the  $L \times L$  matrix representation of  
 340  $\pi_{L,N}\hat{f}_N$ , given by  $\mathbf{A}_{L,N} = [(\phi_{i,N}, (\pi_{L,N}\hat{f}_N)\phi_{j,N})_N]_{i,j=0}^{L-1}$ . Algorithm S7 describes the computation of this matrix (as well as the  
 341 spectral measure of  $\pi_{L,N}\hat{f}_N$ , which we discuss in subsection 2.F.2 below). By Corollary 3, for  $\mu$ -a.e. initial condition  $x_0$ ,  $\mathbf{A}_{L,N}$   
 342 converges as  $N \rightarrow \infty$  to the matrix representation  $\mathbf{A}_L = [(\phi_i, \pi_L f \phi_j)]_{i,j=0}^{L-1}$  of  $\pi_L f$ .

---

**Algorithm S7** Projected multiplication operator representing the forecast observable  $f$  and evaluation of the associated spectral measure. We suppress  $L$  and  $N$  subscripts from our notation of  $\mathbf{A}_{L,N}$  and  $\mathbf{E}_{L,N}(S_m)$ .

---

**Inputs**

1. Training observable values  $f_0, \dots, f_{N-1} \in \mathbb{R}$ .
2. Basis vectors  $\phi_0, \dots, \phi_{L-1}$  from Algorithm S3.
3. Intervals (spectral bins)  $S_0, \dots, S_{M-1} \subseteq \mathbb{R}$ .

*Require:* The training data  $z_n$  used in the computation of  $\phi_l$  are induced by the same dynamical states  $x_n \in X$  underlying  $f_n$ , i.e.,  $z_n = z(x_n)$  and  $f_n = f(x_n)$ .

**Outputs**

1.  $L \times L$  matrix  $\mathbf{A}$  representing the projected multiplication operator  $\pi_{L,N}f$  in the  $\phi_{l,N}$  basis of  $H_{L,N}$ .
2.  $L \times L$  projection matrices  $\mathbf{E}_0, \dots, \mathbf{E}_{M-1}$ , where  $\mathbf{E}_m$  is the matrix representation of the spectral projector  $E_{\pi_{L,N}\hat{f}_N}(S_m)$  in the  $\{\phi_{l,N}\}$  basis of  $H_{L,N}$ .

**Steps**

1. **Return:**  $\mathbf{A} = [A_{ij}]_{i,j=0}^{L-1}$ , where  $A_{ij} = \phi_i^\top (f \odot \phi_j) / N$ ,  $\mathbf{f} = (f_0, \dots, f_{N-1})^\top$ , and  $\odot$  denotes elementwise multiplication of column vectors.
  2. Compute the eigendecomposition  $\mathbf{A}\mathbf{u}_j = a_j\mathbf{u}_j$ , where  $a_0, \dots, a_L \in \mathbb{R}$  and the eigenvectors  $\mathbf{u}_0, \dots, \mathbf{u}_{L-1} \in \mathbb{R}^L$  satisfy  $\mathbf{u}_i^\top \mathbf{u}_j = \delta_{ij}$ .
  3. **Return:** The projection matrices  $\mathbf{E}_0, \dots, \mathbf{E}_{M-1}$ , where  $\mathbf{E}_m = \sum_{a_j \in S_m} \mathbf{u}_j \mathbf{u}_j^\top$ .
- 

343 **F.2. Spectral approximation.** We are interested in approximating the spectral measure of the multiplication operator  $\pi f \in \mathfrak{B}$   
 344 associated with the forecast observable  $f$  by the spectral measures of the finite-rank operators  $\pi_L f \in \mathfrak{B}_L$  and  $\pi_{L,N}\hat{f}_N \in \mathfrak{B}_{L,N}$ .

345 First, we recall that the spectrum of an element  $a$  of a unital  $C^*$ -algebra is the set of complex numbers  $z$  such that  $a - z$   
 346 does not have an inverse. We denote this set as  $\sigma(a)$ . In the case of a finite-dimensional operator algebra such as  $\mathfrak{B}_L$ , and  
 347  $\mathfrak{B}_{L,N}$ , the spectrum of any element  $a$  is a finite set consisting of the eigenvalues of  $a$ . In the case of the infinite-dimensional  
 348 operator algebra  $\mathfrak{B}$ , the spectrum of a multiplication operator  $\pi f$  by an element  $f \in \mathfrak{A}$  is equal to the essential range of  $f$ , i.e.,  
 349 the support of the pushforward measure  $f_*(\mu) : \mathcal{B}(\mathbb{C}) \rightarrow \mathbb{C}$  on the Borel  $\sigma$ -algebra on  $\mathcal{B}(\mathbb{C})$  on  $\mathbb{C}$ . Note that  $\sigma(\pi f)$  coincides  
 350 with the spectrum of  $f$  as an element of the abelian algebra  $\mathfrak{A}$ , defined as the set of complex numbers for which  $f - z$  is  
 351 non-invertible.

352 The point spectrum of  $\pi f$ , i.e., the set of its eigenvalues, consists of all elements  $z \in \sigma(\pi f)$  such that the preimage  
 353  $S = f^{-1}(\{z\}) \subseteq X$  has positive measure,  $\mu(S) > 0$ . We denote the point spectrum of  $\pi f$  by  $\sigma_p(\pi f)$ . Points in the complement  
 354 of  $\sigma_p(\pi f)$  in  $\sigma(\pi f)$  lie in the continuous spectrum of  $\pi f$ , and have no associated eigenspaces. A challenge with spectral  
 355 approximation of multiplication operators on infinite-dimensional operator algebras is that generically they have a non-empty  
 356 continuous spectrum, whereas the continuous spectrum of any finite-rank approximation of these operators is necessarily empty.

357 Suppose now that  $f \in \mathfrak{A}$  is real-valued as per Assumption 1(c), i.e.,  $f$  is a self-adjoint element of the abelian algebra  $\mathfrak{A}$ .  
 358 Then,  $\pi f \in \mathfrak{B}$  is a self-adjoint operator, and the spectrum  $\sigma(\pi f)$  is a subset of the real line. By the spectral theorem for  
 359 self-adjoint operators, there is a unique projection-valued measure (PVM)  $E : \mathcal{B}(\mathbb{R}) \rightarrow \mathfrak{B}$ , giving  $\pi f$  through the spectral  
 360 integral  $\pi f = \int_{\mathbb{R}} u dE(u)$ . By construction, the operators  $\pi_L f \in \mathfrak{B}_L$  and  $\pi_{L,N}\hat{f}_N$  are also self-adjoint whenever  $f$  is real-valued,  
 361 and thus have associated PVMs  $E_L : \mathcal{B}(\mathbb{R}) \rightarrow \mathfrak{B}_L$  and  $E_{L,N} : \mathcal{B}(\mathbb{R}) \rightarrow \mathfrak{B}_{L,N}$ , respectively, such that  $\pi_L f = \int_{\mathbb{R}} u dE_L(u)$

362 and  $\pi_{L,N} \hat{f}_N = \int_{\mathbb{R}} u dE_{L,N}(u)$ . Since the spectra  $\sigma(\pi_L f)$  and  $\sigma(\pi_{L,N} f)$  are finite sets, these spectral measures are discrete.  
 363 Explicitly, for a given Borel set  $S \in \mathcal{B}(\mathbb{R})$ , we have

$$364 \quad E_L(S) = \sum_{l: a_{L,l} \in S} E_{L,l}, \quad E_{L,N}(S) = \sum_{l: a_{L,N,l} \in S} E_{L,N,l}, \quad [\text{S19}]$$

365 where  $\{a_{L,j}\} = \sigma(\pi_L f)$  and  $\{a_{L,N,j}\} = \sigma(\pi_{L,N} f)$  are the sets of eigenvalues of  $\pi_L f$  and  $\pi_{L,N} f$  (without multiplicities), and  
 366  $E_{L,j} \in \mathfrak{B}_L$  and  $E_{L,N,j} \in \mathfrak{B}_{L,N}$  are the orthogonal projections onto the corresponding eigenspaces, respectively.

367 In what follows, we characterize the convergence of  $E_{L,N}$  to  $E_L$  as  $N \rightarrow \infty$  (large data limit) and  $E_L$  to  $E$  as  $L \rightarrow \infty$   
 368 (infinite-dimension limit).

369 **Spectral convergence in the large-data limit.** Let  $\mathbf{A}_L = [\langle \phi_i, (\pi_L f) \phi_j \rangle]_{i,j=0}^{L-1}$  and  $\mathbf{A}_{L,N} = [\langle \phi_{i,N}, (\pi_{L,N} \hat{f}_N) \phi_{j,N} \rangle_N]_{i,j=0}^{L-1}$  be the  
 370 matrix representations of  $\pi_L f$  and  $\pi_{L,N} f$  in the  $\{\phi_l\}$  and  $\{\phi_{l,N}\}$  bases of  $H_L$  and  $H_{L,N}$ , respectively. In the same bases, the  
 371 spectral measures  $E_L$  and  $E_{L,N}$  are represented by matrix-valued measures  $\mathbf{E}_L : \mathcal{B}(\mathbb{R}) \rightarrow \mathbb{M}_L$  and  $\mathbf{E}_{L,N} : \mathcal{B}(\mathbb{R}) \rightarrow \mathbb{M}_L$  such that  
 372  $\mathbf{E}_L(S) = [\langle \phi_i, E_L(S) \phi_j \rangle]_{i,j=0}^{L-1}$  and  $\mathbf{E}_{L,N}(S) = [\langle \phi_{i,N}, E_{L,N}(S) \phi_{j,N} \rangle_N]_{i,j=0}^{L-1}$  are the matrix representations of the projections  
 373  $E_L(S)$  and  $E_{L,N}(S)$  respectively. Since  $\mathbf{A}_{L,N}$  converges to  $\mathbf{A}_L$ , it follows from spectral approximation results for finite-rank  
 374 operators (15) that if the boundary of  $S$  does not contain any eigenvalues of  $\pi_L f$ , then for  $\mu$ -a.e. initial condition  $x_0$  and Borel  
 375 set  $S \in \mathcal{B}(\mathbb{R})$ ,  $\mathbf{E}_{L,N}(S)$  converges as  $N \rightarrow \infty$  to  $\mathbf{E}_L(S)$ .

376 Algorithm S7 describes the computation of the spectral projectors  $\mathbf{E}_{L,N}(S_m)$  on a set of pairwise-disjoint intervals (“spectral  
 377 bins”)  $S_0, \dots, S_{M-1} \subseteq \mathbb{R}$  partitioning the range of  $\hat{f}_N$  in the training data. We choose the intervals  $S_m$  such that they carry  
 378 equal probability mass under the distribution of  $\hat{f}_N$  with respect to the sampling measure  $\mu_N$ . With this choice, the boundaries  
 379 of the  $S_m$  can be computed from the values of the quantile function of  $\hat{f}_N$  on a uniform partition of  $[0, 1]$ ; see Algorithm S8 for  
 380 further details.

---

**Algorithm S8** Spectral bins for the forecast observable  $f$  from the empirical quantile function.

---

**Inputs**

1. Training observable values  $f_0, \dots, f_{N-1} \in \mathbb{R}$ .
2. Number of spectral bins  $M \in \mathbb{N}$ .

**Outputs**

1. Intervals (spectral bins)  $S_0, \dots, S_{M-1} \subseteq \mathbb{R}$ .

**Steps**

1. Compute the empirical quantile function of  $f$ ,  $Q_f : (0, 1) \rightarrow (0, \infty)$ , associated with the samples  $f_n$ .
2. Define  $b_1, \dots, b_{M-1} \in \mathbb{R}$  with  $b_m = m/M$ .
3. **Return:** The intervals  $S_0, \dots, S_{M-1}$ , where

$$S_m = \begin{cases} (-\infty, Q_f(b_1)], & m = 0, \\ (Q_f(b_m), Q_f(b_{m+1})], & 1 < m < M - 1, \\ (Q_f(b_{M-1}), \infty), & m = M - 1. \end{cases}$$


---

381 **Spectral convergence in the infinite-dimension limit.** We employ the following results on spectral approximation of self-adjoint  
 382 operators.

383 **Theorem 5.** Let  $A_L : H \rightarrow H$  be a sequence of finite-rank, self-adjoint operators on a Hilbert space  $H$  converging strongly as  
 384  $L \rightarrow \infty$  to a self-adjoint operator  $A : H \rightarrow H$ . Let  $E : \mathcal{B}(\mathbb{R}) \rightarrow B(H)$  and  $E_L : \mathcal{B}(\mathbb{R}) \rightarrow B(H)$  be the spectral measures of  $A$   
 385 and  $A_L$ , respectively. Then, the following hold.

- 386 (a) For every element  $a$  of the spectrum of  $A$ , there exists a sequence  $a_L$  of eigenvalues of  $A_L$  such that  $\lim_{L \rightarrow \infty} a_L = a$ .
- 387 (b) For every Borel set  $S \in \mathcal{B}(\mathbb{R})$  such that  $E(\partial S) = 0$  (i.e., the boundary of  $S$  does not contain any eigenvalues of  $A$ ), the  
 388 spectral projections  $E_L(S)$  converge to  $E(S)$  in the strong operator topology of  $B(H)$ , i.e.,

$$389 \quad \lim_{L \rightarrow \infty} E_L(S)f = E(S)f, \quad \forall f \in H.$$

390 *Proof.* Strong convergence of bounded self-adjoint operators implies convergence in the strong resolvent sense; see ref. (16),  
 391 Proposition 10.1.13(a). Strong resolvent convergence of operators implies in turn spectral convergence as stated in Part (a);  
 392 see ref. (16), Corollary 10.2.2. For Part (b), see ref. (5), Proposition 13(iii), which states the analogous result under strong  
 393 resolvent convergence of skew-adjoint operators.  $\square$

394 Since the projected multiplication operators  $\pi_L f$  converge to  $\pi f$  strongly and they are self-adjoint whenever  $f$  is real-valued,  
 395 it follows from Theorem 5 with  $A = \pi f$  and  $A_L = \pi_L f$  that the spectra and spectral measures of  $\pi_L f$  converge to those of  $\pi f$   
 396 in the sense stated in the theorem.

397 **G. Koopman operator approximation.** Let  $U \equiv U^{\Delta t}$  be the unitary Koopman operator on  $H$  associated with the temporal  
 398 sampling interval  $\Delta t$  of the data. Following refs. (1–5), we approximate  $U$  by a shift operator  $\hat{U}_N : \hat{H}_N \rightarrow \hat{H}_N$ . Here, we define  
 399  $\hat{U}_N$  as

$$400 \quad \hat{U}_N f(x_n) = \begin{cases} f(x_{n+1}), & 0 \leq n \leq N-2, \\ f(x_0), & n = N-1. \end{cases} \quad [\text{S20}]$$

401 With this definition,  $\hat{U}_N$  is a unitary operator acting as a left circular shift on the sequence of values  $f(x_0), \dots, f(x_{N-1})$ .

402 Next, let  $\tilde{U} : C(X) \rightarrow C(X)$  be the time- $\Delta t$  Koopman operator on continuous (as opposed to  $L^2$ ) functions, defined as  
 403 usual by composition with the time- $\Delta t$  flow,  $\tilde{U} = f \circ \Phi^{\Delta t}$ . Since  $\Phi^{\Delta t}$  is  $\mu$ -preserving, we have

$$404 \quad U \circ \iota = \iota \circ \tilde{U},$$

405 so Eq. (S9) is satisfied for  $A = U$  and  $\tilde{A} = \tilde{U}$ . Moreover, one verifies that Eq. (S10) is satisfied for  $\hat{A}_N = \hat{U}_N$  and  $\tilde{A} = \tilde{U}$  by  
 406 observing that for every  $f \in C(X)$  the vectors  $g = \hat{U}_N \circ \iota_N f$  and  $g' = \iota_N \circ \tilde{U} f$  differ only in the  $(N-1)$ -th component; i.e.,  
 407  $g(x_n) = g'(x_n)$  for all  $n \in \{0, \dots, N-2\}$ . This implies that the residual  $R_N f = g - g'$  has norm

$$408 \quad \|R_N f\|_{\hat{H}_N} \leq \|f\|_{C(X)} / \sqrt{N},$$

409 which verifies Eq. (S10). It therefore follows that Lemma 2 and Corollary 3 apply for  $U$ ,  $\hat{U}_N$ , and  $\tilde{U}$ . Thus, for any  $\mu$ -a.e. initial  
 410 condition  $x_0$  and each  $L \in \mathbb{N}$  such that  $\lambda_{L-1} > 0$ , the data-driven shift operator matrices,  $\mathbf{U}_{L,N} = [\langle \phi_{i,N}, \hat{U}_N \phi_{j,N} \rangle_N]_{i,j=0}^{L-1}$ ,  
 411 converge as  $N \rightarrow \infty$  to the projected time- $\Delta t$  Koopman operator matrices,  $\mathbf{U}_L = [\langle \phi_i, U \phi_j \rangle]_{i,j=0}^{L-1}$ . The projected Koopman  
 412 operators  $U_L$  converge in turn as  $L \rightarrow \infty$  to  $U$  in the strong operator topology of  $\mathfrak{B}$ , as described in section 2.D.1.

413 To approximate the Koopman operator  $U^t$  at time  $t = t_q := q \Delta t$  with  $q \in \mathbb{Z}$ , we repeat the construction described above  
 414 using the  $q$ -th power of the shift operator,  $\hat{U}_N^q$ , as the approximating operator on  $\hat{H}_N$ , which is equivalent to a circular shift  
 415 by  $q$  steps. This leads to projected operators  $U_{L,N}^{(q)} = \mathbf{\Pi}_{L,N} \hat{U}_N^q$  whose matrix representations  $\mathbf{U}_{L,N}^{(q)}$  converge as  $N \rightarrow \infty$  to  
 416 the matrix representation of  $U_L^{(t_q)} = \mathbf{\Pi}_L U^{t_q}$ . As  $L \rightarrow \infty$ ,  $U_L^{(t_q)}$  converges strongly to  $U^{t_q}$  (see Eq. (S8)). Thus, we obtain an  
 417 asymptotically consistent approximation of the dynamical operators employed in QMDA for any given (finite) time horizon  
 418  $t_q = q \Delta t$ .

419 The construction of the  $\mathbf{U}_{L,N}^{(q)}$  matrices is described in Algorithm S9. It is important to note that acting with  $\hat{U}_N^q$  on elements  
 420 of  $\hat{H}_N$  does not require explicit knowledge of the states  $x_n$ . It should also be kept in mind that, unless  $H_{L,N}$  is a  $\hat{U}_N$ -invariant  
 421 subspace of  $\hat{H}_N$ ,  $U_{L,N}^{(q)}$  is not a unitary operator, and it is not equal to the  $q$ -th power of  $U_{L,N}$ . Nevertheless, by unitarity of  
 422  $\hat{U}_N^q$  we have  $U_{L,N}^{(q)*} = U_{L,N}^{(-q)}$ . Similarly,  $U_L^{(t)}$  is in general not equal to  $(U_L)^{t/\Delta t}$ , it is not unitary, but it satisfies  $U_L^{(t)*} = U_L^{(-t)}$ .

---

**Algorithm S9** Koopman operator approximation. We suppress  $L$  and  $N$  indices from our notation of  $\mathbf{U}_{L,N}^{(q)}$ .

---

**Inputs**

1. Basis vectors  $\phi_0, \dots, \phi_{L-1}$  from Algorithm S3.
2. Time-shift parameter  $q \in \mathbb{Z}$ .

*Require:* The underlying training data  $z_0, \dots, z_{N-1}$  are time-ordered and are taken with a uniform sampling interval  $\Delta t > 0$ .

**Outputs**

1.  $L \times L$  matrix  $U^{(q)}$  representing the projected Koopman operator on  $U_{L,N}^{(q)}$  on  $H_{L,N}$ .

**Steps**

1. For each  $l \in \{0, \dots, L-1\}$ , compute the time-shifted vectors  $\phi_i^{(q)} = (\phi_{0l}^{(q)}, \dots, \phi_{N-1,l}^{(q)})^\top \in \mathbb{R}^N$  with

$$\phi_{nt} = \phi_{n'l}, \quad n' = n + l \pmod{N}.$$

2. **Return:** The  $L \times L$  matrix  $U^{(q)} = [U_{ij}^{(q)}]_{i,j=0}^{L-1}$  with  $U_{ij} = \phi_i^\top \phi_j^{(q)} / N$ .
- 

423 *Remark.* The shift operator in Eq. (S20) differs somewhat from the operators used in refs. (1–5), which employ the non-unitary  
 424 definition  $\check{U}_N : \check{H}_N \rightarrow \check{H}_N$  with

$$425 \quad \check{U}_N f(x_n) = \begin{cases} f(x_{n+1}), & 0 \leq n \leq N-2, \\ 0, & n = N-1. \end{cases}$$

426 The difference between the two approaches is inconsequential in the large-data limit, i.e., both  $\hat{U}_{N,L}$  and  $\check{U}_{N,L} := \mathbf{\Pi}_L \check{U}_N$  exhibit  
 427 the  $N \rightarrow \infty$  convergence in Lemma 2 and Corollary 3. Here, we have opted to work with  $\hat{U}_N$  from Eq. (S20), for, as we will see  
 428 in section 2.H below, the unitarity of this operator ensures that the induced Koopman operator on  $\mathfrak{B}_N$  is a quantum channel.

429 **H. Finite-dimensional quantum operations.** In the main text, we introduced the projected Koopman operator  $\mathcal{U}_L^{(t)} : \mathfrak{B}_L \rightarrow \mathfrak{B}_L$ ,  
 430 defined as

$$431 \quad \mathcal{U}_L^{(t)} A = U_L^{(t)} A U_L^{(t)*} = U_L^{(t)} A U_L^{(-t)};$$

432 equivalently,  $\mathcal{U}_L^{(t)} = \Pi_L \circ U^t$ . Letting  $\varpi : \mathfrak{B} \rightarrow \mathfrak{B}$  be the trivial representation,  $\varpi(A) = A$ , we have  $\mathcal{U}_L^{(t)} = \Pi_L \varpi(U^t) \Pi_L$ , so by  
 433 Stinespring’s theorem (see subsection “Positivity-preserving discretization” in the main text)  $\mathcal{U}_L^{(t)}$  is completely positive. We also  
 434 have that  $\mathcal{U}_L^{(t)} = (\mathcal{P}_{L^*}^{(t)})^*$ , where  $\mathcal{P}_{L^*}^{(t)} : \mathfrak{B}_{L^*} \rightarrow \mathfrak{B}_{L^*}$  is the transfer operator on the predual of  $\mathfrak{B}_L$ , defined as  $\mathcal{P}_{L^*}^{(t)} A = U_L^{(-t)} A U_L^{(t)}$ .

435 Next, let  $\rho \in \mathfrak{B}_{L^*}$  be a density operator. This operator extends to a density operator  $\varrho \in \mathfrak{B}_*$  given by  $\varrho = \Pi_L \rho \Pi_L$ . One  
 436 can then verify that the transfer operator  $\mathcal{P}_{L^*}^{(t)} : \mathfrak{B}_{L^*} \rightarrow \mathfrak{B}_{L^*}$  satisfies

$$437 \quad (\mathcal{P}_{L^*}^{(t)} \omega_\rho) \equiv \omega_{\mathcal{P}_{L^*}^{(t)} \rho} \mathbf{1}_L = \text{tr}((U^{-t} \varrho) \Pi_L) \leq \|\Pi_L\|_{\mathfrak{B}} = 1. \quad [\text{S21}]$$

438 By virtue of this fact and the complete positivity of  $\mathcal{U}_L^{(t)}$  it follows that  $\mathcal{U}_L^{(t)}$  is a quantum operation.

439 *Remark.* If  $H_L$  happens to be a Koopman-invariant subspace of  $H$ , i.e.,  $U^t H_L = H_L$ , then  $\text{tr}((U^{-t} \varrho) \Pi_L) = \text{tr}(U^{-t} \varrho) = 1$  and  
 440  $\mathcal{U}_L^{(t)}$  is a quantum channel. This property holds if and only if  $H_L$  is an orthogonal direct sum of Koopman eigenfunctions. The  
 441 existence of such distinguished subspaces of  $H$  cannot be assumed for general measure-preserving dynamical systems. For  
 442 instance, it is a standard result from ergodic theory that if the dynamical flow  $\Phi^t$  is measure-theoretically mixing, then the  
 443 Koopman operator  $U^t : H \rightarrow H$  has only constant eigenfunctions (17).

444 In the data-driven setting of  $\mathfrak{B}_{L,N}$ , we employ an analogous construction based on the unitary shift operator  $\hat{U}_N^q$ . The  
 445 shift operator induces a unitary  $\hat{\mathcal{U}}_N^q : \mathfrak{B}_N \rightarrow \mathfrak{B}_N$  that acts by conjugation by  $\hat{U}_N^q$ , i.e.,  $\hat{\mathcal{U}}_N^q A = \hat{U}_N^q A \hat{U}_N^{q*}$ . This operator is a  
 446 quantum channel analogously to the Koopman operator  $U^t : \mathfrak{B} \rightarrow \mathfrak{B}$ . For  $L \leq N - 1$  we define the projected shift operator  
 447  $\mathcal{U}_{L,N}^{(q)} : \mathfrak{B}_{L,N} \rightarrow \mathfrak{B}_{L,N}$  such that  $\mathcal{U}_{L,N}^{(q)} A = U_{L,N}^{(q)} A U_{L,N}^{(q)*}$ . This operator has entirely analogous properties to the projected  
 448 Koopman operator  $\mathcal{U}_L^{(t)}$ ; that is,  $\mathcal{U}_{L,N}^{(q)}$  is a completely positive map whose associated transfer operator  $\mathcal{P}_{L,N}^{(q)} : \mathfrak{B}_{L,N}^* \rightarrow \mathfrak{B}_{L,N}^*$   
 449 with  $\mathcal{P}_{L,N}^{(q)} = \mathcal{U}_{L,N}^{(q)*}$  is trace-non-increasing (i.e., satisfies an analog of Eq. (S21)). Thus,  $\mathcal{U}_{L,N}^{(q)}$  is a quantum operation.

---

#### Algorithm S10 QMDA forecast–analysis step.

---

##### Inputs

1. Forecast timesteps  $J_f \in \mathbb{N}$ ; observation timesteps  $J_o \in \mathbb{N}$ .
2. Koopman matrices  $\mathbf{U}^{(1)}, \dots, \mathbf{U}^{(J)} \in \mathbb{M}_L$  from Algorithm S9 with  $J = \max\{J_f, J_o\}$ .
3. Spectral bins  $S_0, \dots, S_{M-1} \subseteq R$  from Algorithm S8.
4. Forecast observable  $\mathbf{A} \in \mathbb{M}_L$  and spectral projectors  $\mathbf{E}_0, \dots, \mathbf{E}_{M-1} \in \mathbb{M}_L$  from Algorithm S7.
5. Matrix-valued effect  $\mathbf{F} : Y \rightarrow \mathbb{M}_L$  from Algorithm S12.
6. Initial density matrix  $\rho \in \mathbb{M}_L$ .
7. Observation  $y \in Y$  at time  $J_o \Delta t$ .

*Require:* All  $L \times L$  matrices are representations of operators in  $\mathfrak{B}_{L,N}$  in the same data-driven basis  $\{\phi_{l,N}\}_{l=0}^{L-1}$  from Algorithm S3. All training data are generated by the same sequence of (unknown) time-ordered states  $x_0, \dots, x_{N-1} \in X$  with  $x_n = \Phi^{n \Delta t}(x_0)$ , taken at a fixed sampling interval  $\Delta t > 0$ .

##### Outputs

1. Mean forecast  $\bar{f}_0, \dots, \bar{f}_{J_f} \in \mathbb{R}$  at lead time  $\tau_0, \dots, \tau_{J_f}$  with  $\tau_j = j \Delta t$ .
2. Forecast uncertainty  $\sigma_0, \dots, \sigma_{J_f} \in \mathbb{R}$  at lead time  $\tau_0, \dots, \tau_{J_f}$ .
3. Forecast probability vectors  $\mathbf{p}_0, \dots, \mathbf{p}_{J_f} \in \mathbb{R}^M$  with  $\mathbf{p}_j = (p_{0j}, \dots, p_{Mj})$ .  $p_{mj}$  is the probability that, at lead time  $\tau_j$ , the forecast observable  $f$  lies in spectral bin  $S_m$ .
4. Posterior density matrix  $\rho^{(+)} \in \mathbb{M}_L$  at time  $J_o \Delta t$ .

##### Steps

1. Set  $\mathbf{U}^{(0)} = \text{Id}$ .
2. For each  $j \in \{0, \dots, J\}$  compute the time-evolved density matrix  $\rho_j = \sigma_j / C_j$  with  $\sigma_j = (\mathbf{U}^{(j)})^\top \rho \mathbf{U}^{(j)}$  and  $C_j = \text{tr} \sigma_j$ .
3. **Return:** The mean forecasts  $\bar{f}_j = \text{tr}(\rho_j \mathbf{A})$  for  $j \in \{0, \dots, J_f\}$ .
4. **Return:** The forecast uncertainties  $\sigma_j = (\text{tr}(\rho_j \mathbf{A}^2) - \bar{f}_j^2)^{1/2}$  for  $j \in \{0, \dots, J_f\}$ .
5. **Return:** The probability vectors  $\mathbf{p}_j$  with  $p_{mj} = \text{tr}(\rho_j \mathbf{E}_m)$  for  $m \in \{0, \dots, M - 1\}$  and  $j \in \{0, \dots, J_f\}$ .
6. Compute the effect matrix  $\mathbf{E}_y = \mathbf{F}'(y)$ .
7. **Return:** The posterior density matrix

$$\rho^{(+)} = \frac{\mathbf{E}_y \rho_{J_o} \mathbf{E}_y}{\text{tr}(\mathbf{E}_y \rho_{J_o} \mathbf{E}_y)}.$$

---

450 Algorithm S10 describes the QMDA forecast of  $f : X \rightarrow \mathbb{R}$  via the quantum operation  $\mathcal{U}_{N,L}^{(q)}$  applied to the corresponding  
 451 projected multiplication operators  $\pi_{L,N} \hat{f}_N$ . Algorithm S11 specializes the forecasting procedure to pure (vector) states, which  
 452 allow representation of density matrices  $\rho \in \mathbb{M}_L$  by their corresponding state vectors,  $\rho = \xi \xi^\dagger$  where  $\xi$  is a unit vector in  $\mathbb{C}^L$ .  
 453 Algorithms S10 and S11 also include the analysis step based on effect-valued maps, which we describe in section 2.J.

---

**Algorithm S11** QMDA forecast–analysis step, specialized to pure states.

---

**Inputs**

1. Forecast timesteps  $J_f \in \mathbb{N}$ ; observation timesteps  $J_o \in \mathbb{N}$ .
2. Koopman matrices  $\mathbf{U}^{(1)}, \dots, \mathbf{U}^{(J)} \in \mathbb{M}_L$  from Algorithm S9 with  $J = \max\{J_f, J_o\}$ .
3. Spectral bins  $S_0, \dots, S_{M-1} \subseteq R$  from Algorithm S8.
4. Forecast observable  $\mathbf{A} \in \mathbb{M}_L$  and spectral projectors  $\mathbf{E}_0, \dots, \mathbf{E}_{M-1} \in \mathbb{M}_L$  from Algorithm S7.
5. Matrix-valued effect  $\mathbf{F} : Y \rightarrow \mathbb{M}_L$  from Algorithm S12.
6. Initial state vector  $\boldsymbol{\xi} \in \mathbb{C}^L$ .
7. Observation  $y \in Y$  at time  $J_o \Delta t$ .

*Require:* All  $L \times L$  matrices are representations of operators in  $\mathfrak{B}_{L,N}$  in the same data-driven basis  $\{\phi_{l,N}\}$  from Algorithm S3. All training data are induced by the same sequence of (unknown) time-ordered states  $x_0, \dots, x_{N-1} \in X$  with  $x_n = \Phi^{n\Delta t}(x_0)$ , taken at a fixed sampling interval  $\Delta t > 0$ .

**Outputs**

1. Mean forecast  $\bar{f}_0, \dots, \bar{f}_{J_f} \in \mathbb{R}$  at lead time  $\tau_0, \dots, \tau_{J_f}$  with  $\tau_j = j \Delta t$ .
2. Forecast uncertainty  $\sigma_0, \dots, \sigma_{J_f} \in \mathbb{R}$  at lead time  $\tau_0, \dots, \tau_{J_f}$ .
3. Forecast probability vectors  $\mathbf{p}_0, \dots, \mathbf{p}_{J_f} \in \mathbb{R}^M$  with  $\mathbf{p}_j = (p_{0j}, \dots, p_{Mj})$ .  $p_{mj}$  is the probability that, at lead time  $\tau_j$ , the forecast observable  $f$  lies in spectral bin  $S_m$ .
4. Posterior state vector  $\boldsymbol{\xi}^{(+)} \in \mathbb{C}^L$  at time  $J_o \Delta t$ .

**Steps**

1. Set  $\mathbf{U}^{(0)} = \text{Id}$ .
2. For each  $j \in \{0, \dots, J\}$  compute the time-evolved state vector  $\boldsymbol{\xi}_j = \mathbf{u}_j / \|\mathbf{u}_j\|_2$  with  $\mathbf{u}_j = (\mathbf{U}^{(j)})^\top \boldsymbol{\xi}$ .
3. **Return:** The mean forecasts  $\bar{f}_j = \boldsymbol{\xi}_j^\dagger \mathbf{A} \boldsymbol{\xi}_j$  for  $j \in \{0, \dots, J_f\}$ .
4. **Return:** The forecast uncertainties  $\sigma_j = (\boldsymbol{\xi}_j^\dagger \mathbf{A}^2 \boldsymbol{\xi}_j - \bar{f}_j^2)^{1/2}$  for  $j \in \{0, \dots, J_f\}$ .
5. **Return:** The probability vectors  $\mathbf{p}_j$  with  $p_{mj} = \boldsymbol{\xi}_j^\dagger \mathbf{E}_m \boldsymbol{\xi}_j$  for  $m \in \{0, \dots, M-1\}$  and  $j \in \{0, \dots, J_f\}$ .
6. Compute the effect matrix  $\mathbf{E}_y = \mathbf{F}(y)$ .
7. **Return:** The posterior state vector

$$\boldsymbol{\xi}^{(+)} = \frac{\mathbf{E}_y \boldsymbol{\xi}_{J_o}}{\|\mathbf{E}_y \boldsymbol{\xi}_{J_o}\|_2}.$$


---

454 **I. Channel consistency.** The asymptotic consistency of the quantum operations  $\mathcal{U}_{L,N}^{(g)}$  readily follows from the results established  
 455 in the previous subsections.

456 First, given  $A \in \mathfrak{B}$  and  $A_L = \mathbf{\Pi}_L A$ , it is a direct consequence of the strong convergence of  $U_L^{(t)}$  to  $U^t$  and of  $A_L$  to  $A$ ,  
 457 together with the uniform boundedness of these operators, that  $\mathcal{U}_L^{(t)} A_L$  converges to  $U^t A$  in the strong topology of  $\mathfrak{B}$ , i.e.,

$$458 \quad \lim_{L \rightarrow \infty} (\mathcal{U}_L^{(t)} A_L) f = (U^t A) f, \quad \forall f \in H. \quad [\text{S22}]$$

459 As a result, for every normal state  $\omega_\rho \in S_*(\mathfrak{B})$  induced by a density operator  $\rho \in \mathfrak{B}_*$ , Eq. (S15) yields

$$460 \quad \lim_{L \rightarrow \infty} (\mathcal{P}_L^{(t)} \omega_{\rho_L}) A_L = \lim_{L \rightarrow \infty} \omega_{\rho_L} (\mathcal{U}_L^{(t)} A_L) = \omega_\rho A, \quad [\text{S23}]$$

461 where  $\rho_L = \mathbf{\Pi}_L \rho / \text{tr}(\mathbf{\Pi}_L \rho) \in \mathfrak{B}_L$  are the projected density operators induced by  $\rho$ . Eq. (S23) establishes the consistency of the  
 462 quantum operations  $\mathcal{U}_L^{(t)}$  with the channel  $U^{(t)}$  in the infinite-dimension limit.

463 Next, turning to the consistency of  $\mathcal{U}_{L,N}^{(g)}$  in the large-data ( $N \rightarrow \infty$ ) limit, we restrict attention to states in the subset  
 464  $S_C(\mathfrak{B}) \subset S_*(\mathfrak{B})$  from subsection 2.E.2 and elements  $A \in \mathfrak{B}$  satisfying Eq. (S9) and Eq. (S10). We also consider evolution times  
 465  $t_q = q \Delta t$  with  $q \in \mathbb{N}$ . Under these assumptions, it follows from Eq. (S17) that for  $\mu$ -a.e. initial state  $x_0$ ,

$$466 \quad \lim_{L \rightarrow \infty} \lim_{N \rightarrow \infty} (\mathcal{P}_{L,N}^{(q)} \omega_{\rho_{L,N}}) A_{L,N} = \lim_{L \rightarrow \infty} (\mathcal{P}_L^{(t_q)} \omega_{\rho_L}) A_L = (\mathcal{P}^t \omega_\rho) A. \quad [\text{S24}]$$

467 Eq. (S24) holds, in particular, for data-driven, projected multiplication operators  $A_{L,N} = \pi_{L,N} \hat{f}_N$  associated with continuous  
 468 functions  $f : X \rightarrow \mathbb{R}$  and pure states  $\hat{\rho}_{N,L}$  induced by continuous state vectors, as in the QMDA experiments described in the  
 469 main text.

470 **J. Effect-valued feature map.** In this subsection, we describe the construction and properties of the effect-valued feature map  
 471  $\mathcal{F} : Y \rightarrow \mathcal{E}(\mathfrak{B})$  and its finite-rank counterparts,  $\mathcal{F}_L : Y \rightarrow \mathcal{E}(\mathfrak{B}_L)$  and  $\mathcal{F}_{L,N} : Y \rightarrow \mathcal{E}(\mathfrak{B}_{L,N})$ , used in the analysis step of QMDA.  
 472 As stated in the main text, we build these maps using a continuous, symmetric kernel on observations space  $\psi : Y \times Y \rightarrow [0, 1]$   
 473 and a family of data-dependent symmetric, continuous kernels  $\psi_N : Y \times Y \rightarrow [0, 1]$  with  $N \in \mathbb{N}$ , such that, as  $N \rightarrow \infty$ ,  
 474 the pullback kernels  $w_N : X \times X \rightarrow [0, 1]$  with  $w_N(x, x') = \psi_N(h(x), h(x'))$  converge uniformly to  $w : X \times X \rightarrow [0, 1]$  with  
 475  $w(x, x') = \psi(h(x), h(x'))$ .

476 As a concrete example, in the L96 and ENSO experiments described in the main text we employ variable-bandwidth, bump  
 477 kernels on  $Y = \mathbb{R}^d$ ,

$$478 \quad \psi_N(y, y') = \eta_{\text{bump}} \left( \frac{d(y, y')}{\epsilon \sqrt{b_N(y) b_N(y')}} \right). \quad [\text{S25}]$$

479 In Eq. (S25),  $\eta_{\text{bump}} : \mathbb{R} \rightarrow \mathbb{R}$  is the bump function

$$480 \quad \eta_{\text{bump}}(u) = \begin{cases} e^{-1/(1-u^2)}, & u \in (-1, 1), \\ 0, & \text{otherwise,} \end{cases} \quad [\text{S26}]$$

481  $d : Y \times Y \rightarrow \mathbb{R}_+$  is the Euclidean distance,  $b_N : Y \rightarrow \mathbb{R}_+$  is a bandwidth function obtained by applying Algorithm S2 to the  
 482 training data  $y_0, \dots, y_{N-1} \in Y$ , and  $\epsilon > 0$ . As in section 2.B, we set  $\epsilon = s_\psi \epsilon_*$ , where  $s_\psi > 0$  is a scaling parameter and  $\epsilon_*$   
 483 is the optimal bandwidth parameter determined via Algorithm S6. Note that  $b_N$  and  $\epsilon$  in Eq. (S25) are different from the  
 484 bandwidth function and bandwidth parameter used in Eq. (S4) and Eq. (S5) (the former are based on data  $y_n \in Y$  whereas  
 485 the latter are based on data  $z_n \in Z$ ).

486 The choice of kernel in Eq. (S25) is motivated by the fact that the classical Bayesian analysis step of data assimilation  
 487 can be modeled as an effect-valued map  $\tilde{F} : Y \rightarrow \mathcal{E}(\mathfrak{A})$  for the abelian algebra  $\mathfrak{A} = L^\infty(X, \mu)$ , where  $\tilde{F}(y) = \chi_{Y^{-1}(y)}$  and  
 488  $\chi_S : X \rightarrow \{0, 1\}$  denotes the characteristic function of a set  $S \subseteq X$ . The effect-valued map  $F_N : Y \rightarrow \mathcal{E}(\mathfrak{A})$  induced by the  
 489 kernel in Eq. (S25),  $F_N(y) = \psi_N(y, h(\cdot))$ , can be thought of as a smoothed version of  $\tilde{F}$ . In L96 and ENSO experiments not  
 490 reported here, we found that using a fixed-bandwidth kernel in the analysis step (i.e., setting  $b_N(y) = b_N(y') = 1$  in Eq. (S25)  
 491 led to a noticeable reduction of forecast skill, particularly in the higher-dimensional ENSO case. We also ran experiments using  
 492 the Gaussian shape function  $\eta_{\text{gauss}}$  (as opposed to  $\eta_{\text{bump}}$ ) in the definition of the kernel  $\psi_N$ , using either of the variable- or  
 493 fixed-bandwidth versions. The results were generally comparable to those reported in the main text, though we found that the  
 494 bump kernel did provide a modest amount of skill improvement over the Gaussian kernel.

495 Let  $F : Y \rightarrow \mathcal{E}(\mathfrak{A})$  be the effect-valued map associated with the kernel  $\psi$ ,

$$496 \quad \psi(y, y') = \eta_{\text{bump}} \left( \frac{d(y, y')}{\epsilon \sqrt{b(y) b(y')}} \right),$$

497 where the bandwidth function  $b : Y \rightarrow \mathbb{R}_+$  is the uniform limit of  $b_N$  (note that we will not need this map in actual numerical  
 498 applications). As described in the main text, in the setting of the non-abelian algebra  $\mathfrak{B}$ , we promote  $F$  to an operator-valued  
 499 map  $\mathcal{F} : Y \rightarrow \mathcal{E}(\mathfrak{B})$ , where  $\mathcal{F}(y) = \pi(\mathcal{F}(y))$ . Moreover, we introduce projected and data-driven versions of these maps, given  
 500 by  $\mathcal{F}_L : Y \rightarrow \mathcal{E}(\mathfrak{B}_L)$  and  $\mathcal{F}_{L,N} : Y \rightarrow \mathcal{E}(\mathfrak{B}_{L,N})$ , respectively, where  $\mathcal{F}_L = \pi_L \circ \mathcal{F}$ ,  $\mathcal{F}_{L,N} = \pi_{L,N} \circ \hat{\mathcal{F}}_N$ , and  $\hat{\mathcal{F}}_N : Y \rightarrow \mathcal{E}(\mathfrak{A}_N)$  is  
 501 given by restriction of  $F_N$  on the set of training states  $X_N$ ,  $\hat{F}_N(y) = \iota_N(F_N(y))$ . State conditioning (analysis) based on these  
 502 maps has the following consistency properties.

503 **Proposition 6.** Let  $\omega_\rho$  be a state of  $\mathfrak{B}$  in  $S_C(\mathfrak{B})$  and  $y$  an observation in  $Y$ . Let  $\rho_{L,N}^{(+)}$  and  $\rho_L^{(+)}$  be the matrix representations  
504 of the conditional states  $\omega_{\rho_{L,N}}|_{\mathcal{F}_{L,N}(y)} \in S(\mathfrak{B}_{L,N})$  and  $\omega_{\rho_L}|_{\mathcal{F}_L(y)}$  obtained via Eq. (7) in the  $\{\phi_{l,N}\}$  and  $\{\phi_l\}$  bases of  $H_{L,N}$   
505 and  $H_L$ , respectively. Then the following hold.

- 506 (a) For  $\mu$ -a.e. initial state  $x_0 \in X$ ,  $\lim_{N \rightarrow \infty} \rho_{L,N}^{(+)} = \rho_L^{(+)}$ .  
507 (b) As  $L \rightarrow \infty$ ,  $\omega_{\rho_L}|_{\mathcal{F}_L(y)}$  converges to  $\omega_\rho|_{\mathcal{F}(y)}$  in the trace norm topology of  $S_*(\mathfrak{B})$ .

508 *Proof.* We use an auxiliary map  $\tilde{\mathcal{F}} : Y \rightarrow \mathfrak{C}$ , defined as  $\tilde{\mathcal{F}}(y) = \tilde{\pi}(F^{1/2}(y))$ . For each  $y \in Y$ , we have

$$509 \quad \iota \circ (\tilde{\mathcal{F}}(y)) = (\mathcal{F}(y)) \circ \iota$$

510 by construction. Moreover, by our assumed uniform convergence of  $w_N$  to  $w$ , we have that for every  $f \in C(X)$ , the residual

$$511 \quad R_N f = (\iota_N \circ (\tilde{\mathcal{F}}(y))) f - (\hat{\mathcal{F}}_N(y) \circ \iota_N) f$$

512 has vanishing  $\hat{H}_N$  norm as  $N \rightarrow \infty$ , for  $\mu$ -a.e. initial condition  $x_0$ . Thus, Eq. (S9) and Eq. (S10) hold for  $A = \mathcal{F}(y)$ ,  $\tilde{A} = \tilde{\mathcal{F}}(y)$ ,  
513 and  $A_N = \hat{\mathcal{F}}_N(y)$ , and correspondingly Eq. (S14), Lemma 2, and Corollary 3 also hold. The claims of the proposition follow.  $\square$

514 Computationally, a drawback of using  $\mathcal{F}_{L,N}$  for state conditioning is that evaluation of Eq. (7) requires the square root  
515  $\sqrt{\mathcal{F}_{L,N}(y)}$ . Specifically, we have  $\omega_{\rho_{L,N}}|_{\mathcal{F}_{L,N}(y)} = \omega_{\rho_{L,N}^{(+)}}$ , where

$$516 \quad \rho_{L,N}^{(+)} = \frac{\sqrt{\mathcal{F}_{L,N}(y)} \rho_{L,N} \sqrt{\mathcal{F}_{L,N}(y)}}{\text{tr}(\sqrt{\mathcal{F}_{L,N}(y)} \rho_{L,N} \sqrt{\mathcal{F}_{L,N}(y)})}, \quad [\text{S27}]$$

517 and computing  $\sqrt{\mathcal{F}_{L,N}(y)}$  requires computing the square root of the matrix  $\mathbf{F}_{L,N}(y) = [\langle \phi_{i,N}, \mathcal{F}_{L,N}(y) \phi_{j,N} \rangle_N]_{i,j=0}^{L-1}$  representing  
518  $\mathcal{F}_{L,N}(y)$  in the  $\{\phi_{l,N}\}$  basis of  $H_{L,N}$ . To avoid having to perform this expensive operation at every observational update, in  
519 applications we replace  $\sqrt{\mathcal{F}_{L,N}(y)}$  by  $\mathcal{F}'_{L,N}(y)$ , where  $\mathcal{F}'_{L,N} : Y \rightarrow \mathcal{E}(\mathfrak{B}_{L,N})$  is the effect-valued map defined as

$$520 \quad \mathcal{F}'_{L,N}(y) = \pi_{L,N}(\hat{F}_N^{1/2}(y)).$$

521 The construction of this map is described in Algorithm S12. Using  $\mathcal{F}'_{L,N}$ , the update of a density operator  $\rho_{L,N} \in \mathfrak{B}_{L,N*}$  given  
522 an observation  $y \in Y$  becomes (cf. Eq. (S27))

$$523 \quad \rho_{L,N}^{(+)} = \frac{\mathcal{F}'_{L,N}(y) \rho_{L,N} \mathcal{F}'_{L,N}(y)}{\text{tr}(\mathcal{F}'_{L,N}(y) \rho_{L,N} \mathcal{F}'_{L,N}(y))}. \quad [\text{S28}]$$

524 In the limit of  $L \rightarrow \infty$  after  $N \rightarrow \infty$ , updating via Eq. (S28) consistently recovers  $\omega_\rho|_{\mathcal{F}(y)}$  analogously to Proposition 6. See  
525 step 7 of Algorithm S10 for the matrix function that implements Eq. (S28) in the  $\{\phi_{l,N}\}$  basis of  $H_{L,N}$ . Step 7 of Algorithm S11  
526 specializes the state update procedure to pure states.

---

#### Algorithm S12 Effect-valued feature map.

---

##### Inputs

1. Kernel function  $\kappa : Y \times Y \rightarrow [0, 1]$ .
2. Training data  $y_0, \dots, y_{N-1} \in Y$ .
3. Basis vectors  $\phi_0, \dots, \phi_{L-1}$  from Algorithm S3.

*Require:* The training data  $z_n$  used in the computation of  $\phi_l$  are generated by the same dynamical states  $x_n \in X$  underlying  
 $f_n$ , i.e.,  $z_n = z(x_n)$  and  $f_n = f(x_n)$ .

##### Outputs

1. Matrix-valued map  $\mathbf{F}'_{L,N} : Y \rightarrow \mathbb{M}_L$  representing the effect-valued function  $\mathcal{F}'_{L,N} : Y \rightarrow \mathcal{E}(\mathfrak{B}_{L,N})$ .

##### Steps

1. Construct the feature map  $\mathbf{f}'_N : Y \rightarrow \mathbb{R}^N$  where  $\mathbf{f}'_N(y) = (\psi_N^{1/2}(y, y_0), \dots, \psi_N^{1/2}(y, y_{N-1}))^\top$ .
  2. **Return:** The function  $\mathbf{F}'_{L,N} : Y \rightarrow \mathbb{M}_L$ , where  $\mathbf{F}'_{L,N}(y) = \mathbf{E} = [E_{ij}]_{i,j=0}^{L-1}$  and  $E_{ij} = \phi_i^\top (\mathbf{f}'_N(y) \odot \phi_j) / N$ .
- 

527 **K. Computational cost.** The training data requirements and computational cost of QMDA are generally comparable to those of  
528 kernel methods for supervised machine learning.



529 **K.1. Training phase.** Letting  $d_Z$  denote the dimension of the training data space  $Z$ , the brute-force computation cost of forming  
530 the  $N \times N$  kernel matrix  $\hat{\mathbf{K}}_N$  via Algorithm S3 is  $O(d_Z N^2)$ . As mentioned in section 2.B, if  $N$  is sufficiently large so that the  
531 storage and arithmetic cost associated with  $\hat{\mathbf{K}}_N$  is prohibitive, we approximate  $\hat{\mathbf{K}}_N$  by a sparse matrix that contains the  $\hat{k}_{\text{nn}}$   
532 largest elements of  $\hat{\mathbf{K}}_N$  in each row. The storage cost and matrix–vector multiplication cost for  $\hat{\mathbf{K}}_N$  then become  $O(\hat{k}_{\text{nn}} N)$ .  
533 The arithmetic cost of forming  $\hat{\mathbf{K}}_N$  can be reduced to  $O(N \log N)$  when  $d_Z$  and  $\hat{k}_{\text{nn}}$  are sufficiently small using randomized  
534 approximate nearest neighbor algorithms, e.g., (18). The datasets used in this study were sufficiently small so that all of our  
535 experiments were performed without using nearest-neighbor truncation, although in separate calculations we have verified that  
536 setting  $\hat{k}_{\text{nn}} \simeq 0.1N$  is sufficient to produce good-quality eigenfunctions at a significantly lower computational cost.

537 We compute the basis vectors  $\phi_{l,N}$  associated with  $\hat{\mathbf{K}}_N$  using iterative SVD solvers (e.g., `svds` in MATLAB). The cost  
538 of this computation depends on the spectral properties of  $\hat{\mathbf{K}}_N$  and the number  $L$  of requested basis vectors, but generally  
539 scales linearly with  $\hat{k}_{\text{nn}}$  and  $N$ . Once the basis  $\{\phi_{l,N}\}_{l=0}^{L-1}$  has been computed, we form the  $L \times L$  matrices  $\mathbf{A}_{L,N}$  and  $\mathbf{U}_{L,N}^{(q)}$   
540 representing the projected forecast observable and Koopman operator via Algorithms S7 and S9, respectively, each with an  
541  $O(NL^2)$  computational cost. We also compute the full eigendecomposition of  $\mathbf{A}_{L,N}$  (see Step 2 of Algorithm S7) at an  $O(L^3)$   
542 cost.

543 **K.2. Data assimilation phase.** The computational complexity of the data assimilation phase of QMDA depends on whether one  
544 employs mixed states (Algorithm S10) or pure states (Algorithm S11). In both cases, the cost of evaluating the matrix-valued  
545 feature map  $\mathbf{F}_{L,N}$  is  $O(dNL^2)$ , where  $d$  is the dimension of the observation space  $Y$ . This is the only step in the data  
546 assimilation phase whose cost depends on the amount of training data  $N$ . If mixed states are used, the cost of the forecast and  
547 analysis steps is dominated by matrix–matrix multiplication of  $L \times L$  matrices, and is thus  $O(L^3)$  (independently of  $N$ ). In the  
548 case of pure states, these operations are replaced by matrix–vector products, which leads to a reduction of cost to  $O(L^2)$ . More  
549 generally, the computational cost of the forecast and analysis steps with rank- $r$  density matrices is  $O(rL^2)$ .

550 In applications, it is desirable to work with prediction algorithms where the out-of-sample evaluation cost increases slowly  
551 with training size  $N$ , or is even independent on  $N$ . This motivates exploring approximations of the matrix-valued feature  
552 map  $\mathbf{F}_{L,N}$  with a more favorable scaling in  $N$  than the linear scaling of the brute-force approach. To that end, possible  
553 approaches include the randomized Nyström method for streaming PCA (19) and landmark methods for manifold learning  
554 (20, 21). The recent paper (22) developed a streaming formulation of the kernel analog forecast technique (23) using random  
555 Fourier feature methods (24) for kernel approximation in conjunction with the randomized Nyström method. This approach  
556 was found to exhibit similar forecast skill to the brute-force approach employed in ref. (25) for predicting the slow variables of  
557 the L96 multiscale system at a cost which is independent of the training data. As future work, it would be fruitful to explore  
558 applications of these methodologies in the context of QMDA.

### 559 3. Quantum circuit implementation

560 In this section, we describe the construction of the quantum circuit in Fig. 6 that implements the analysis and forecast steps of  
561 QMDA. The circuit is composed of three parameterized unitary transformations  $T_{\text{init}}$ ,  $T_{\text{K}}$ , and  $T_{\text{tot}}$  acting on the  $n$ -qubit Hilbert  
562 space  $\mathbb{B}_n$ , whose role is to perform state initialization, Koopman evolution, and eigenbasis rotation, respectively, as discussed in  
563 the main text. Our numerical implementation is based on the Qiskit Python library (26), and can be found in the Jupyter  
564 notebook `/examples/196Multiscale_qmda/196MultiscaleQmda.ipynb` contained in the GitHub repository <https://dg227.github.io/NLSA>.

565 **A. Initialization.** Suppose that at time  $t_n = n \Delta t$  the matrix mechanical data assimilation system is in the prior state  
566  $\omega_{n-1,1} \in S(\mathfrak{B}_{L,N})$ . Suppose also that  $\omega_{n-1,1}$  is a pure state with associated state vector  $\xi_{n-1,1} \in H_{L,N}$ . Then, given an  
567 observation  $\hat{y}_n \in Y$ , the transformation  $T_{\text{init}}(\xi_{n-1,1}, \hat{y}_n) \in \mathfrak{M}_n$  is defined such that  $\zeta_n := T_{\text{init}}(\xi_{n-1,1}, \hat{y}_n) |\mathbf{0}\rangle$  is the quantum  
568 computational representation of the state vector  $\xi_n \in H_{L,N}$  associated with the posterior state  $\omega_n = \omega_{n-1,1} |_{\mathcal{F}_{L,N}(\hat{y}_n)}$ . That  
569 is, we have  $\zeta_n = W_{L,N} \xi_n$ , where  $W_{L,N} : H_{L,N} \rightarrow \mathbb{B}_n$  is the unitary that maps the  $\{\phi_l\}_{l=0}^{L-1}$  basis of  $H_{L,N}$  to the quantum  
570 computational basis  $\{|\mathbf{b}\rangle\}_{\mathbf{b} \in \{0,1\}^n}$  of  $\mathbb{B}_n$  where  $L = 2^n$  (see main text). Numerically, we implement  $T_{\text{init}}(\xi_{n-1,1}, \hat{y}_n)$  using the  
571 `QuantumCircuit.initialize` method provided by Qiskit.

572 **B. Koopman evolution.** Let  $j \in \mathbb{N}$  be the number of forecast timesteps corresponding to lead time  $\tau_j = j \Delta t$ . Assuming that  
573 the 1-step projected Koopman operator  $U_{L,N}^{(1)} \in \mathfrak{B}_{L,N}$  is unitary,  $T_{\text{K}}(j) \in \mathfrak{M}_n$  implements the state vector evolution under  
574 the iterated action of the adjoint of  $U_{L,N}^{(1)}$  (the projected transfer operator) over  $j$  timesteps, i.e.,  $T_{\text{K}}(j) = W_L (U_{L,N}^{(1)})^{*j} W_L^*$ . In  
575 Qiskit, we implement this operation using the `UnitaryGate` class.

576 As discussed in the main text (see also section 2.H), in general we cannot expect  $U_{L,N}^{(1)}$  to be a unitary operator. Thus, in  
577 order to use it in a noise-free quantum circuit, where all operations must be unitary, we first pass its matrix representation  $U_{L,N}^{(1)}$   
578 through the polar decomposition to extract its unitary part. That is, unless  $U_{L,N}^{(1)}$  happens to be unitary to sufficient numerical  
579 precision, we first compute a polar decomposition  $U_{L,N}^{(1)} = \tilde{U}_{L,N}^{(1)} \tilde{\mathbf{P}}_{L,N}^{(1)}$  where  $\tilde{U}_{L,N}^{(1)}$  is unitary and  $\tilde{\mathbf{P}}_{L,N}^{(1)} = (U_{L,N}^{(1)} (U_{L,N}^{(1)})^*)^{1/2}$ ,  
580 and then implement  $T_{\text{K}}(j) = W_L (\tilde{U}_{L,N}^{(1)})^{*j} W_L^*$  where  $\tilde{U}_{L,N}^{(1)} \in \mathfrak{B}_{L,N}$  is the linear operator represented by  $\tilde{U}_{L,N}^{(1)}$ .

581 We should point out that aside from the polar decomposition step, the circuit implementation of QMDA differs from  
582 Algorithm S1 in that the time- $\tau_j$  Koopman operator is approximated iteratively as  $(\tilde{U}_{L,N}^{(1)})^j$  as opposed to the direct approximation  
583  $U_{L,N}^{(j)}$  (see also Algorithm S9). While both approaches are asymptotically consistent in the limit of  $L \rightarrow \infty$  after  $N \rightarrow \infty$ , at  
584 finite  $N$  and/or  $L$  they will generally yield different forecast skill.

585 **C. Eigenbasis rotation.** The eigenbasis rotation step  $T_{\text{rot}}$  is performed so that measurement at the output of the quantum circuit  
 586 in Fig. 5 is consistent with measurement of the spectral measure  $E_{L,N}$  of the projected multiplication operator  $A_{L,N} = \pi_{L,N} \hat{f}_N$   
 587 associated with the forecast observable  $f$ , given the quantum state  $\omega_{n,j} \in S(\mathfrak{B}_{L,N})$  for initialization time  $t_n = n \Delta t$  and lead  
 588 time  $\tau_j = j \Delta t$ .

Let  $A_{L,N} u_{L,N,l} = a_{L,N,l} u_{L,N,l}$  be an eigendecomposition of  $A_{L,N}$ , where  $\{u_{L,N,l}\}_{l=0}^{L-1}$  are orthonormal eigenvectors in  $H_{L,N}$   
 and the eigenvalues  $a_{L,N,l} \in \mathbb{R}$  are ordered in increasing order with multiplicities included. With such an eigendecomposition,  
 we can express the spectral measure  $E_{L,N}$  from Eq. (S19) as

$$E_{L,N}(S)g = \sum_{l: a_{L,N,l} \in S} \langle u_{L,N,l}, g \rangle_N u_{L,N,l}, \quad \forall S \in \mathcal{B}(\mathbb{R}), \quad \forall g \in H_{L,N}.$$

589 Next, letting  $\mathbf{R}_{L,N} \in \mathbb{M}_L$  be the unitary matrix whose  $l$ -th column is the column vector representation  $\mathbf{u}_{L,N,l}$  of  $u_{L,N,l}$  in the  
 590  $\{\phi_{l,N}\}$  basis, we define  $R_{L,N} : H_{L,N} \rightarrow H_{L,N}$  as the unitary operator represented by that matrix and  $\mathcal{R}_{L,N} : \mathfrak{B}_{L,N} \rightarrow \mathfrak{B}_{L,N}$  as  
 591  $\mathcal{R}_{L,N} A = R_{L,N}^* A R_{L,N}$ . We then have that  $D_{L,N} := \mathcal{R}_{L,N} A_{L,N}$  is a diagonal operator with respect to the  $\{\phi_{l,N}\}$  basis, i.e.,  
 592  $D_{L,N} \phi_{l,N} = a_{l,L,N} \phi_{l,N}$ . The spectral measure  $\tilde{E}_{L,N} : \mathcal{B}(\mathbb{R}) \rightarrow \mathfrak{B}_{L,N}$  of this operator satisfies

$$\tilde{E}_{L,N}(S)g = (\mathcal{R}_{L,N} E_{L,N}(S))g = \sum_{l: a_{L,N,l} \in S} \langle \phi_{L,N,l}, g \rangle_N \phi_{L,N,l}, \quad \forall S \in \mathcal{B}(\mathbb{R}), \quad \forall g \in H_{L,N}. \quad [\text{S29}]$$

Given a state  $\omega_\rho \in S(\mathfrak{B}_{L,N})$  induced by a density operator  $\rho \in \mathfrak{B}_{L,N}$ , we have  $\omega_\rho A = \omega_{\mathcal{R}_{L,N}\rho}(\mathcal{R}_{L,N} A)$  for any  $A \in \mathfrak{B}_{L,N}$ .  
 The latter, in conjunction with Eq. (S29) implies that evaluation of the spectral measure  $E_{L,N}$  given the state  $\rho$  is equivalent  
 to evaluation of  $\tilde{E}_{L,N}$  given the state  $\mathcal{R}_{L,N}\rho$ ; that is,

$$\omega_\rho(E_{L,N}(S)) = \omega_{\mathcal{R}_{L,N}\rho}(\tilde{E}_{L,N}(S)).$$

594 If  $\omega_\rho$  is a pure state induced by a state vector  $\xi \in H_{L,N}$ , then  $\omega_{\mathcal{R}_{L,N}\rho}$  is a pure state induced by the rotated vector  $\tilde{\xi} = R_{L,N}^* \xi$ ,  
 595 and the above identity reduces to

$$\langle \xi, E_{L,N}(S)\xi \rangle_N = \langle \tilde{\xi}, \tilde{E}_{L,N}(S)\tilde{\xi} \rangle_N. \quad [\text{S30}]$$

We will now represent  $\tilde{E}_{L,N}$  by an equivalent spectral measure associated with the quantum computational basis of  $\mathbb{B}_n$ .  
 Recall that the quantum computational basis  $\{|\mathbf{b}\rangle\}_{\mathbf{b} \in \{0,1\}^n}$  is indexed by binary strings  $\mathbf{b} = (b_1, \dots, b_n)$  of length  $n$ . Associated  
 with this basis is a spectral measure  $\mathbb{E}_n : \Sigma(\{0,1\}^n) \rightarrow B(\mathbb{B}_n)$  on the  $\sigma$ -algebra  $\Sigma(\{0,1\}^n)$  of all subsets of  $\{0,1\}^n$  such that

$$\mathbb{E}_n(\hat{S})\hat{g} = \sum_{\mathbf{b} \in \hat{S}} \langle \mathbf{b}, g \rangle_n |\mathbf{b}\rangle, \quad \forall \hat{S} \in \Sigma(\{0,1\}^n), \quad \forall \hat{g} \in \mathbb{B}_n.$$

597 Measurement at the output of the circuit corresponds to measurement of  $\mathbb{E}_n$ ; that is, given a state vector  $\zeta \in \mathbb{B}_n$ , we obtain a  
 598 random binary string  $\mathbf{b} \in \{0,1\}^n$  with probability  $\langle \zeta, \mathbb{E}_n(\{\mathbf{b}\})\zeta \rangle_n$ .

599 Given a binary string  $\mathbf{b} \in \{0,1\}^n$ , we let  $\ell(\mathbf{b}) \in \{0, \dots, L-1\}$  denote the integer with binary representation  $\mathbf{b}$ , i.e.,  
 600  $\ell(\mathbf{b}) = \sum_{i=1}^n 2^{n-i} b_i$ . To map a measurement of  $\tilde{E}_{L,N}$  to a measurement of  $\mathbb{E}_n$ , we define the set function  $\gamma : \mathcal{B}(\mathbb{R}) \rightarrow \Sigma(\{0,1\}^n)$   
 601 such that  $\gamma(S) = \{\mathbf{b} \in \{0,1\}^n : a_{L,N,\ell(\mathbf{b})} \in S\}$ . In essence,  $\gamma$  represents an encoding of the eigenvalues  $a_{L,N,l}$  by the binary  
 602 representation of the index  $l$ . One can then directly verify that the spectral measures  $\tilde{E}_{L,N}$  and  $\mathbb{E}_n$  are related as

$$\mathcal{W}_{L,N} \tilde{E}_{L,N}(S) = \mathbb{E}_n(\gamma(S)), \quad \forall S \in \mathcal{B}(\mathbb{R}). \quad [\text{S31}]$$

Combining Eq. (S30) and Eq. (S31), we get

$$\omega_\rho(E_{L,N}(S)) = \langle \tilde{\zeta}, \mathbb{E}_n(\gamma(S))\tilde{\zeta} \rangle_n,$$

604 where  $\tilde{\zeta} = \mathcal{W}_{L,N} \tilde{\xi}$  is the quantum computational representation of state vector  $\tilde{\xi}$ . In summary, measurement of the spectral  
 605 measure  $E_{L,N}$  associated with the forecast observable given the state  $\rho$  is equivalent to measurement of the quantum  
 606 computational spectral measure  $\mathbb{E}_n$  given the quantum computational representation  $\tilde{\zeta}$  of the *rotated* state vector  $\tilde{\xi}$ .

607 In the circuit of Fig. 6, the transformation  $T_{\text{rot}}$  is introduced to effect that rotation after the Koopman evolution stage.  
 608 Specifically, we define  $T_{\text{rot}} : \mathbb{B}_n \rightarrow \mathbb{B}_n$  as the unitary map whose matrix representation in the quantum computational  
 609 basis is  $\mathbf{R}_{L,N}$ , i.e., the same as the representation of  $R_{L,N}$  in the  $\{\phi_{l,N}\}$  basis of  $H_{L,N}$ . With this definition, we have  
 610  $\mathcal{W}_{L,N} R_{L,N} = T_{\text{rot}} \mathcal{W}_{L,N}$ , so application of  $T_{\text{rot}}$  to the quantum computational representation  $\mathcal{W}_{L,N} \xi$  of a state vector  $\xi \in H_{L,N}$   
 611 yields the quantum computational representation  $\mathcal{W}_{L,N} \tilde{\xi}$  of the rotated state vector  $\tilde{\xi} = R_{L,N} \xi$ , as desired. As with the  
 612 implementation of the Koopman evolution  $T_K$ , we implement  $T_{\text{rot}}$  using Qiskit's UnitaryGate.

## 613 4. Forecast skill metrics

614 We assess the skill of the QMDA forecasts in the main text using normalized root mean square error (NRMSE) and anomaly  
615 correlation (AC) scores. Using throughout the notation of the main text and Algorithm S1, we perform forecasts of  $f$  at lead  
616 times  $\tau_j = j \Delta t$  with  $j \in \{0, \dots, J_f - 1\}$  given initial data  $\hat{y}_0, \dots, \hat{y}_{\hat{N}-1} \in Y$ . We let  $\bar{f}_{n,j} \in \mathbb{R}$  be the mean forecast at lead time  
617  $\tau_j$  initialized with data  $\hat{y}_n$ . Given the values  $\hat{f}_0, \dots, \hat{f}_{\hat{N}+J_f-1} \in \mathbb{R}$  of  $f$  in the verification interval, the error of the forecast mean  
618  $\bar{f}_{n,j}$  relative to the true value of  $f$  is  $\varepsilon_{n,j} = \bar{f}_{n,j} - \hat{f}_{n+j}$ .

619 Let  $\mathbb{E}_N f$  and  $\text{var}_N f$  be the empirical mean and variance of  $f$  computed from the training data,

$$620 \quad \mathbb{E}_N f = \int_X f d\mu_N = \frac{1}{N} \sum_{n=0}^{N-1} f_n, \quad \text{var}_N f = \int_X (f - \mathbb{E}_N f)^2 d\mu_N = \frac{1}{N} \sum_{n=0}^{N-1} (f_n - \mathbb{E}_N f)^2.$$

621 We define the NRMSE and AC scores for lead time  $\tau_j$  as

$$622 \quad \text{NRMSE}(\tau_j) = \sqrt{\frac{1}{\hat{N} \text{var}_N f} \sum_{n=0}^{\hat{N}-1} \varepsilon_{n,j}^2}, \quad \text{AC}(\tau_j) = \frac{1}{\hat{N} \text{var}_N f} \sum_{n=0}^{\hat{N}-1} (\bar{f}_{n,j} - \mathbb{E}_N f)(\hat{f}_{n+j} - \mathbb{E}_N f),$$

623 respectively.

624 NRMSE values close to 0 and AC values close to 1 indicate high forecast skill. NRMSE values approaching 1 indicate loss of  
625 skill as the expected forecast error is comparable to the standard deviation of the forecast observable. In climate dynamics  
626 applications, such as ENSO forecasting,  $\text{AC} = 0.6$  or  $\text{AC} = 0.5$  are commonly used thresholds indicating loss of skill.

## 627 5. Dataset description

628 In this section, we describe the properties of the L96 multiscale and CCSM4 datasets used in the experiments presented in  
629 the main text. A summary of the attributes of the datasets and the QMDA parameters used in our numerical experiments is  
630 provided in Table S3.

631 **A. L96 multiscale.** We integrate the L96 multiscale system in Eq. (13) in MATLAB using the built-in stiff solver `ode15s`, sampling  
632 the numerical trajectory every  $\Delta t = 0.05$  model time units. We note that the use of a stiff solver is important for numerical  
633 accuracy due to the timescale separation between the  $x_k$  and  $y_{j,k}$  variables occurring at small  $\varepsilon$ . As noted in the main text, our  
634 training and test data are sampled on independent dynamical trajectories. The initial conditions for the trajectory  $x_0, \dots, x_{N-1} \in$   
635  $\mathbb{R}^{J(K+1)}$  underlying the training data are  $(x_1, \dots, x_K) = (1, 0, \dots, 0) \in \mathbb{R}^K$  and  $(y_{1,k}, \dots, y_{J,k}) = (1, 0, \dots, 0) \in \mathbb{R}^J$  for each  
636  $k \in \{1, \dots, K\}$ . Similarly, we initialize the test trajectory  $\hat{x}_0, \dots, \hat{x}_{\hat{N}-1} \in \mathbb{R}^{J(K+1)}$  at  $(x_1, \dots, x_K) = (1.2, 0, \dots, 0) \in \mathbb{R}^K$  and  
637  $(y_{1,k}, \dots, y_{J,k}) = (1.2, 0, \dots, 0) \in \mathbb{R}^J$  for each  $k \in \{1, \dots, K\}$ . Starting from these initial conditions, we let the two trajectories  
638 equilibrate to the attractor over a time interval of  $10^4 \Delta t = 500$  model time units before collecting the first samples,  $x_0$  and  $\hat{x}_0$ .

639 **B. CCSM4.** We sample data every  $\Delta t = 1$  month, spanning a 1,300-year period from a control integration of CCSM4 forced  
640 with fixed pre-industrial concentrations of greenhouse gases (27). Following ref. (28), the observation map  $h : X \rightarrow Y \equiv \mathbb{R}^d$   
641 returns the monthly averaged sea surface temperature (SST) field on the model's native ocean grid (of approximately  $1^\circ$  nominal  
642 resolution) over the Indo-Pacific longitude-latitude box  $28^\circ\text{E}$ – $70^\circ\text{W}$ ,  $30^\circ\text{S}$ – $20^\circ\text{N}$ . The number of gridpoints within this domain  
643 (which corresponds to the observation space dimension) is  $d = 44,414$ . As the forecast observable  $f : X \rightarrow \mathbb{R}$ , we use the  
644 model's Niño 3.4 index—this is defined as the area-averaged SST anomaly over the domain  $170^\circ\text{W}$ – $120^\circ\text{W}$ ,  $5^\circ\text{S}$ – $5^\circ\text{N}$  relative to  
645 a monthly climatology computed over the training period. Specifically, let  $\tilde{h} : X \rightarrow \mathbb{R}^d$  denote the observable representing the  
646 SST field over the Niño 3.4 region. For each  $m \in \{1, \dots, 12\}$ , define the monthly climatology  $\bar{h}^{(m)} \in \mathbb{R}^d$  as

$$647 \quad \bar{h}^{(m)} = \frac{1}{N_y} \sum_{\substack{0 \leq n \leq N-1 \\ \text{month}(n)=m}} \tilde{h}(x_n),$$

648 where  $\text{month}(n) := (n \bmod 12) + 1$  is the calendar month associated with the  $n$ -th sample in the training data.

## 649 References

- 650 1. Berry T, Giannakis D, Harlim J (2015) Nonparametric forecasting of low-dimensional dynamical systems. *Phys. Rev. E*.  
651 91:032915.
- 652 2. Giannakis D, Slawinska J, Zhao Z (2015) Spatiotemporal feature extraction with data-driven Koopman operators in  
653 *Proceedings of the 1st International Workshop on Feature Extraction: Modern Questions and Challenges at NIPS 2015*,  
654 Proceedings of Machine Learning Research, eds. Storcheus D, Rostamizadeh A, Kumar S. (PMLR, Montreal, Canada),  
655 Vol. 44, pp. 103–115.
- 656 3. Giannakis D (2019) Data-driven spectral decomposition and forecasting of ergodic dynamical systems. *Appl. Comput.*  
657 *Harmon. Anal.* 47(2):338–396.

- 658 4. Giannakis D (2019) Quantum mechanics and data assimilation. *Phys. Rev. E* 100:032207.
- 659 5. Das S, Giannakis D, Slawinska J (2021) Reproducing kernel Hilbert space compactification of unitary evolution groups.
- 660 *Appl. Comput. Harmon. Anal.* 54:75–136.
- 661 6. von Luxburg U, Belkin M, Bousquet O (2008) Consistency of spectral clustering. *Ann. Stat.* 26(2):555–586.
- 662 7. Giannakis D (2021) Delay-coordinate maps, coherence, and approximate spectra of evolution operators. *Res. Math. Sci.*
- 663 8:8.
- 664 8. Coifman R, Hirn M (2013) Bi-stochastic kernels via asymmetric affinity functions. *Appl. Comput. Harmon. Anal.*
- 665 35(1):177–180.
- 666 9. Berry T, Harlim J (2016) Variable bandwidth diffusion kernels. *Appl. Comput. Harmon. Anal.* 40(1):68–96.
- 667 10. Coifman RR, Lafon S (2006) Diffusion maps. *Appl. Comput. Harmon. Anal.* 21:5–30.
- 668 11. Sriperumbudur BK, Fukumizu K, Lanckriet GR (2011) Universality, characteristic kernels and RKHS embedding of
- 669 measures. *J. Mach. Learn. Res.* 12:2389–2410.
- 670 12. Sauer T, Yorke JA, Casdagli M (1991) Embedology. *J. Stat. Phys.* 65(3–4):579–616.
- 671 13. Grigor’yan A, Hu J, Lau KS (2014) Heat kernels on metric measure spaces in *Geometry and Analysis of Fractals*, Springer
- 672 Proceedings in Mathematics and Statistics, eds. Feng DJ, Lau KS. (Springer, Berlin) Vol. 88, pp. 147–207.
- 673 14. Coifman RR, Shkolnisky Y, Sigworth FJ, Singer A (2008) Graph Laplacian tomography from unknown random projections.
- 674 *IEEE Trans. Image Process.* 17(10):1891–1899.
- 675 15. Chatelin F (2011) *Spectral Approximation of Linear Operators*, Classics in Applied Mathematics. (Society for Industrial
- 676 and Applied Mathematics, Philadelphia).
- 677 16. de Oliveira CR (2009) *Intermediate Spectral Theory and Quantum Dynamics*, Progress in Mathematical Physics. (Birkhäuser,
- 678 Basel) Vol. 54.
- 679 17. Walters P (1981) *An Introduction to Ergodic Theory*, Graduate Texts in Mathematics. (Springer-Verlag, New York)
- 680 Vol. 79.
- 681 18. Jones PW, Osipov A, Rokhlin V (2011) Randomized approximate nearest neighbors algorithm. *Proc. Natl. Acad. Sci.*
- 682 108(38):15679–15686.
- 683 19. Halko N, Martinsson PG, Tropp J (2011) Finding structure with randomness: Probabilistic algorithms for constructing
- 684 approximate matrix decompositions. *SIAM Rev.* 53(2):217–288.
- 685 20. Long AW, Ferguson AL (2019) Landmark diffusion maps (L-dMaps): Accelerated manifold learning out-of-sample extension.
- 686 *Appl. Comput. Harmon. Anal.* 47:190–211.
- 687 21. Shen C, Lin YT, Wu HT (2022) Robust and scalable manifold learning via landmark diffusion for long-term medical signal
- 688 processing. *J. Mach. Learn. Res.* 23:1–30.
- 689 22. Giannakis D, Henriksen A, Tropp JA, Ward R (2022) Learning to forecast dynamical systems from streaming data. *SIAM*
- 690 *J. Appl. Dyn. Syst.* In press.
- 691 23. Alexander R, Giannakis D (2020) Operator-theoretic framework for forecasting nonlinear time series with kernel analog
- 692 techniques. *Phys. D* 409:132520.
- 693 24. Rahimi A, Recht B (2007) Random features for large-scale kernel machines in *Advances in Neural Information Processing*
- 694 *Systems*, eds. Platt J, Koller D, Singer Y, Roweis S. (Curran Associates, Inc.), Vol. 20, pp. 1177–1184.
- 695 25. Burov D, Giannakis D, Manohar K, Stuart A (2021) Kernel analog forecasting: Multiscale test problems. *Multiscale*
- 696 *Model. Simul.* 19(2):1011–1040.
- 697 26. Anis MS, , et al. (2021) Qiskit: An open-source framework for quantum computing.
- 698 27. CCSM (2010) Community Climate System Model Version 4 (CCSM4) data. <https://www.earthsystemgrid.org/dataset/ucar.cgd.cesm4.joc.b40.1850.track1.1deg.006.html>. Accessed March 2019.
- 699 28. Wang X, Slawinska J, Giannakis D (2020) Extended-range statistical ENSO prediction through operator-theoretic
- 700 techniques for nonlinear dynamics. *Sci. Rep.* 10:2636.
- 701
